# Supplementary material for: Synthesis of selenated isochromenones by AgNO3-catalyzed three-component reaction of alkynylaryl esters, selenium powder and ArB(OH)2
Source: Royal Society of Chemistry journal article supplement (doi:10.1039/d0ra06016j), 2020-01-01

*Supporting Information for*

**Synthesis of Selenated Isochromenones by**

***AgNO<sub>3</sub>-Catalyzed Radical Cyclization of Alkynylaryl***

***Esters, Selenium Powder and ArB(OH)<sub>2</sub>***

Guo-Qing Jin,<sup>[a]</sup> Wen-Xia Gao,<sup>[a]</sup> Yun-Bing Zhou,<sup>\*[a]</sup> Miao-Chang Liu<sup>\*[a]</sup> and  
Hua-Yue Wu<sup>[a]</sup>

<sup>a</sup>College of Chemistry and Materials Engineering, Wenzhou University, Wenzhou  
325035, People's Republic of China

**Table of Contents**

|                                                                                         |            |
|-----------------------------------------------------------------------------------------|------------|
| <b>1. General information.....</b>                                                      | <b>S2</b>  |
| <b>2. General experimental procedures.....</b>                                          | <b>S3</b>  |
| <b>3. GC-MS data.....</b>                                                               | <b>S4</b>  |
| <b>4. Characterization of products in details.....</b>                                  | <b>S5</b>  |
| <b>5. <sup>1</sup>H, <sup>13</sup>C and <sup>19</sup>F NMR spectra of products.....</b> | <b>S13</b> |

## 1. General Information

All reagents and solvents were purchased from TCI, Sigma-Aldrich, Alfa Aesar, Acros and Meryer. All reactions were conducted using standard Schlenk techniques. Column chromatography was performed using EM silica gel 60 (300–400 mesh).  $^1\text{H}$  NMR,  $^{13}\text{C}$  NMR and  $^{19}\text{F}$  NMR spectra were measured on a 500 MHz Bruker AVANCE spectrometer (500 MHz for  $^1\text{H}$ , 125 MHz for  $^{13}\text{C}$  and 470 MHz for  $^{19}\text{F}$ ), using  $\text{CDCl}_3$  as the solvent with tetramethylsilane (TMS) as the internal standard at room temperature. Chemical shifts were reported in ppm.  $^1\text{H}$  NMR spectra were referenced to  $\text{CDCl}_3$  (7.26 ppm), and  $^{13}\text{C}$ -NMR spectra were referenced to  $\text{CDCl}_3$  (77.0 ppm). Peak multiplicities were designated by the following abbreviations: s, singlet; d, doublet; t, triplet; m, multiplet. Chemical shifts are given in  $\delta$  relative to TMS, the coupling constants  $J$  are given in Hz. Analysis of crude reaction mixture was done on the Varian 4000 GC/MS and Agilent 7890A/5975C. High-resolution mass spectra were recorded on a micrOTOF-Q II 10410 mass spectrometer.

Unless otherwise noted, all reagents and solvents were obtained commercially and used without further purification. The methyl 2-(arylethynyl)benzoate<sup>[1]</sup> and ethyl 2-(phenylethynyl)benzoate<sup>[2]</sup>, isopropyl 2-(phenylethynyl)benzoate<sup>[2]</sup>, phenyl 2-(phenylethynyl)benzoate<sup>[3]</sup>, [1,1'-biphenyl]-4-yl 2-(phenylethynyl)benzoate<sup>[3]</sup> were prepared according to corresponding literature procedures.

## 2. General experimental procedure

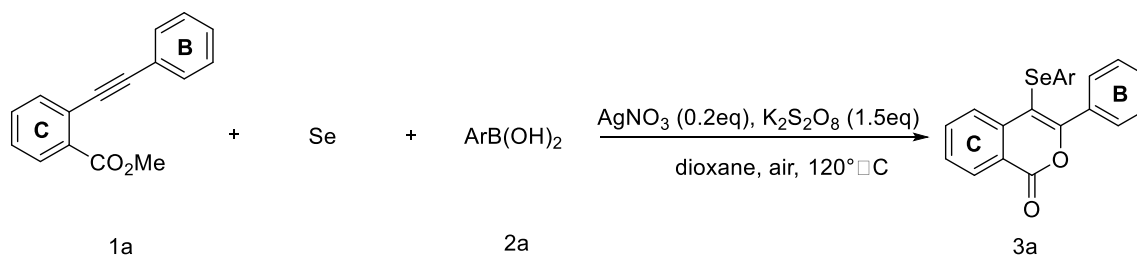

A 25 mL Schlenk tube equipped with a stir bar was charged with AgNO<sub>3</sub> (0.06 mmol), 2a (0.6 mmol), Se (0.6 mmol), 1a (0.3 mmol) and dioxane (2 mL) was added in turn to the Schlenk tube, The reaction mixture was stirred at 120 °C for 20 h. After cooling down, the reaction mixture was diluted with 10 mL of ethyl ether, filtered

through a pad of silica gel and concentrated under reduced pressure. The residue was then purified by flash chromatography on silica gel to provide the corresponding product.

### 3. GC-MS data

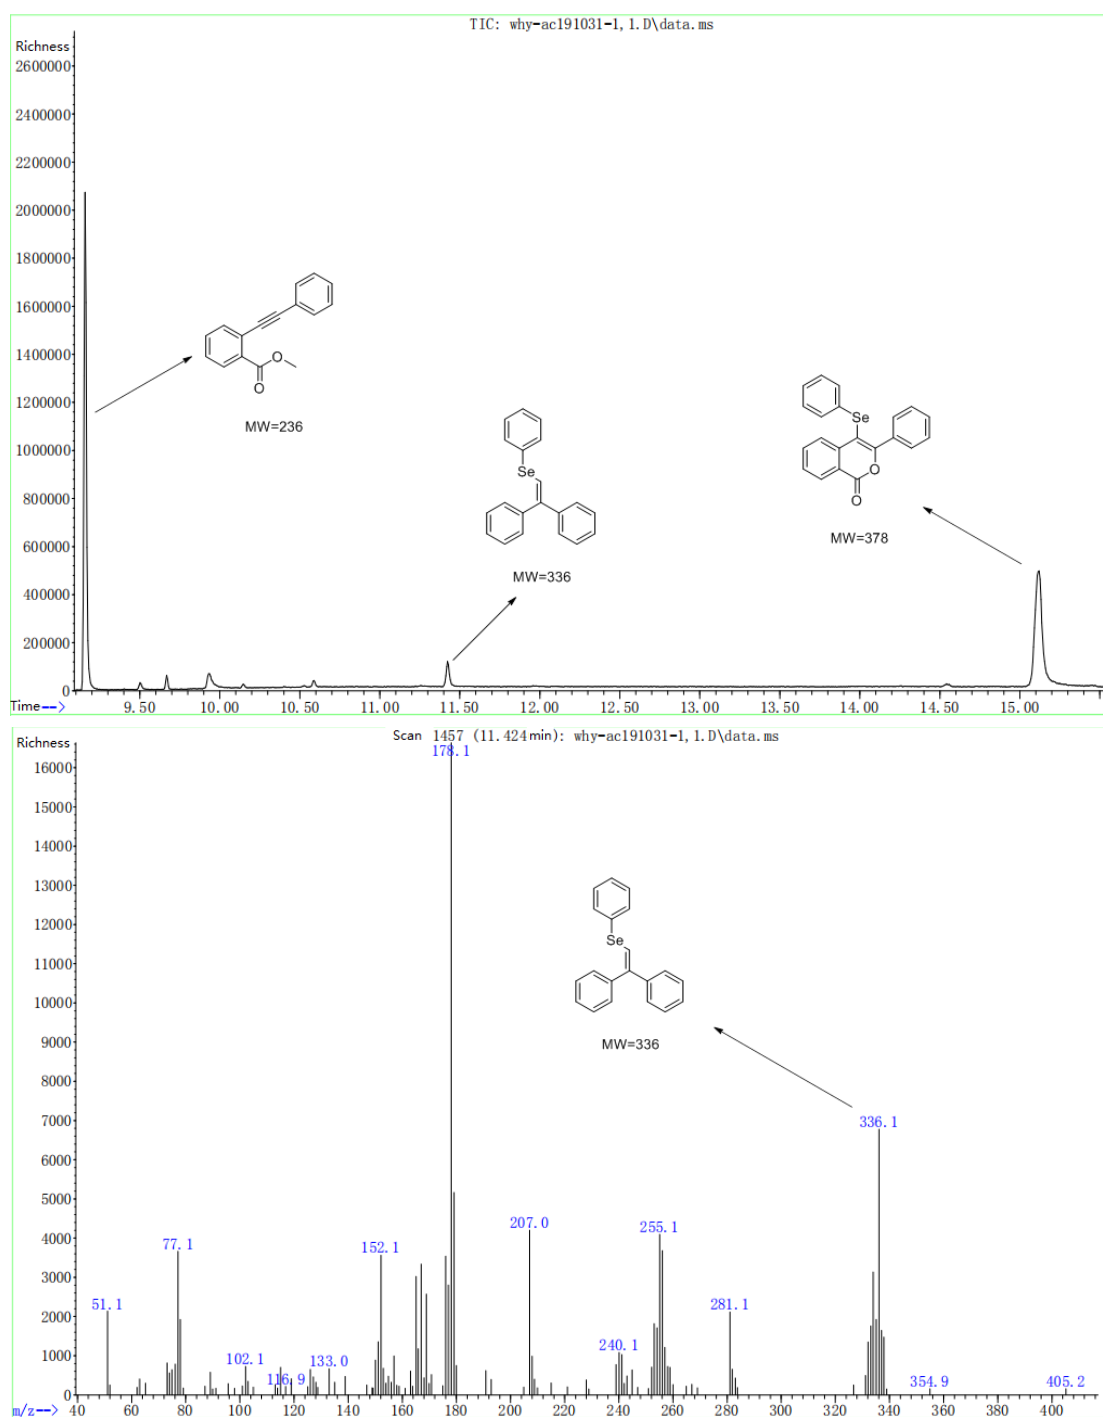

The GC-MS shows an  $m/z$  peak of 336, which is in good agreement with that of a selenium radical intermediate.

## 4. Characterization of products in details

### 3-phenyl-4-(phenylselanyl)-1H-isochromen-1-one (3a) <sup>[4]</sup>

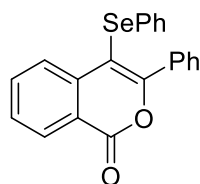

White solid (104 mg, 92% yield); EtOAc/PE = 1/40. <sup>1</sup>H NMR (500 MHz, CDCl<sub>3</sub>) δ 8.37-8.36 (m, 1H), 8.06-8.05 (m, 1H), 7.73-7.70 (m, 1H), 7.67-7.65 (m, 2H), 7.55-7.52 (m, 1H), 7.46-7.40 (m, 3H), 7.21-7.15 (m, 5H); <sup>13</sup>C NMR (125 MHz, CDCl<sub>3</sub>) δ 161.7, 159.6, 138.5, 135.3, 134.1, 131.8, 130.1, 129.7, 129.6, 129.5, 128.9, 128.7, 128.3, 127.8, 126.5, 120.9, 104.8.

### 4-((4-fluorophenyl)selanyl)-3-phenyl-1H-isochromen-1-one (3ba) <sup>[4]</sup>

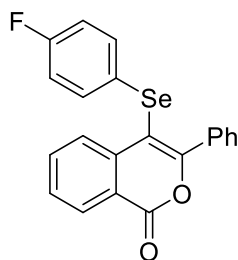

White solid (60.6 mg, 51% yield); EtOAc/PE = 1/40. <sup>1</sup>H NMR (500 MHz, CDCl<sub>3</sub>) δ 8.37-8.35 (m, 1H), 8.07-8.05 (m, 1H), 7.75-7.72 (m, 1H), 7.65-7.63 (m, 2H), 7.56-7.53 (m, 1H), 7.47-7.40 (m, 3H), 7.17-7.14 (m, 2H), 6.90-6.87 (m, 2H); <sup>13</sup>C NMR (125 MHz, CDCl<sub>3</sub>) δ 162.0 (d, *J* = 245.0 Hz), 161.6, 159.5, 138.3, 135.4, 134.0, 131.3 (d, *J* = 8.8 Hz), 130.2, 129.8, 129.7, 128.8, 128.1, 127.9, 126.0 (d, *J* = 3.8 Hz), 120.9, 116.7 (d, *J* = 21.3 Hz), 105.4. <sup>19</sup>F NMR (470 MHz, CDCl<sub>3</sub>) δ -115.2 (s, 1F).

### 4-((4-chlorophenyl)selanyl)-3-phenyl-1H-isochromen-1-one (3ca) <sup>[4]</sup>

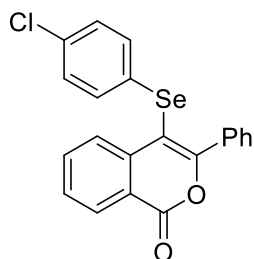

White solid (102.6 mg, 83% yield); EtOAc/PE = 1/40. <sup>1</sup>H NMR (500 MHz, CDCl<sub>3</sub>) δ 8.38-8.36 (m, 1H), 8.01-8.00 (m, 1H), 7.74-7.71 (m, 1H), 7.64-7.62 (m, 2H),

7.57-7.54 (m, 1H), 7.47-7.40 (m, 3H), 7.16-7.14 (m, 2H), 7.12-7.10 (m, 2H); <sup>13</sup>C NMR (125 MHz, CDCl<sub>3</sub>) δ 161.5, 159.8, 138.2, 135.4, 133.9, 132.7, 130.3, 130.2, 130.0, 129.9, 129.6, 129.5, 128.8, 128.0, 127.9, 120.9, 104.7.

#### 4-((4-bromophenyl)selanyl)-3-phenyl-1H-isochromen-1-one (3da)

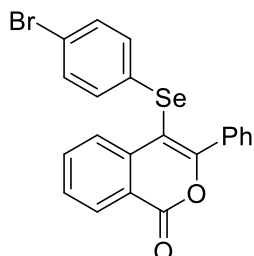

White solid (101.2 mg, 74% yield); mp 105.0-106.4 °C; EtOAc/PE = 1/40. <sup>1</sup>H NMR (500 MHz, CDCl<sub>3</sub>) δ 8.38-8.36 (m, 1H), 8.00-7.99 (m, 1H), 7.74-7.71 (m, 1H), 7.64-7.62 (m, 2H), 7.57-7.54 (m, 1H), 7.46-7.41 (m, 3H), 7.31-7.29 (m, 2H), 7.06-7.04 (m, 2H); <sup>13</sup>C NMR (125 MHz, CDCl<sub>3</sub>) δ 161.5, 159.9, 138.1, 135.5, 133.9, 132.5, 130.7, 130.5, 130.3, 129.9, 129.6, 128.9, 128.0, 127.9, 120.9, 120.6, 104.5. HRMS (ESI): calculated for C<sub>21</sub>H<sub>14</sub>BrO<sub>2</sub>Se [M+H]<sup>+</sup> 456.9337, found 456.9320.

#### 4-((4-iodophenyl)selanyl)-3-phenyl-1H-isochromen-1-one (3ea)

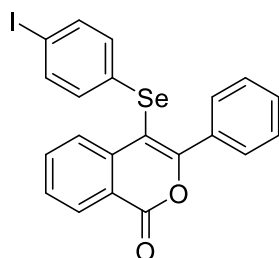

White solid (54.4 mg, 36% yield); mp 106.8-107.4 °C; EtOAc/PE = 1/40. <sup>1</sup>H NMR (500 MHz, CDCl<sub>3</sub>) δ 8.37-8.36 (m, 1H), 7.99-7.98 (m, 1H), 7.73-7.70 (m, 1H), 7.64-7.62 (m, 2H), 7.56-7.53 (m, 1H), 7.49-7.39 (m, 5H), 6.93-6.91 (m, 2H); <sup>13</sup>C NMR (125 MHz, CDCl<sub>3</sub>) δ 161.5, 159.9, 138.4, 138.1, 135.5, 133.9, 131.8, 130.6, 130.3, 129.9, 129.6, 128.9, 128.0, 127.9, 120.9, 104.3, 91.5. HRMS (ESI): calculated for C<sub>21</sub>H<sub>14</sub>IO<sub>2</sub>Se [M+H]<sup>+</sup> 504.9198, found 504.9193.

#### 3-phenyl-4-(p-tolylselanyl)-1H-isochromen-1-one (3fa) <sup>[4]</sup>

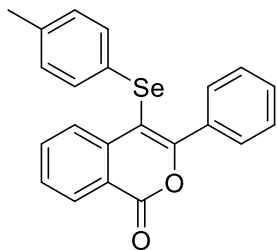

White solid (108 mg, 92% yield); EtOAc/PE = 1/40.  $^1\text{H}$  NMR (500 MHz,  $\text{CDCl}_3$ )  $\delta$  8.37-8.36 (m, 1H), 8.09-8.08 (m, 1H), 7.71-7.69 (m, 3H), 7.54-7.51 (m, 1H), 7.45-7.40 (m, 3H), 7.12-7.11 (m, 2H), 7.02-7.00 (m, 2H), 2.26 (s, 3H);  $^{13}\text{C}$  NMR (125 MHz,  $\text{CDCl}_3$ )  $\delta$  161.7, 159.4, 138.6, 136.5, 135.3, 134.2, 130.3, 130.1, 129.8, 129.7, 129.2, 128.6, 128.4, 128.0, 127.8, 120.9, 105.2, 21.0.

**4-((4-(tert-butyl)phenyl)selanyl)-3-phenyl-1H-isochromen-1-one (3ga)**

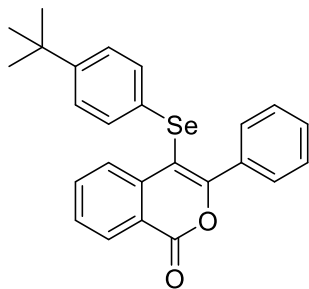

White solid (86 mg, 66% yield); mp 102.0-102.4 °C; EtOAc/PE = 1/40.  $^1\text{H}$  NMR (500 MHz,  $\text{CDCl}_3$ )  $\delta$  8.37-8.36 (m, 1H), 8.11-8.10 (m, 1H), 7.73-7.68 (m, 3H), 7.55-7.52 (m, 1H), 7.44-7.40 (m, 3H), 7.22-7.21 (m, 2H), 7.14-7.13 (m, 2H), 1.26 (s, 9H);  $^{13}\text{C}$  NMR (125 MHz,  $\text{CDCl}_3$ )  $\delta$  161.7, 159.4, 149.8, 138.7, 135.3, 134.2, 130.0, 129.8, 129.7, 128.9, 128.6, 128.4, 128.1, 127.8, 126.6, 120.9, 105.1, 34.5, 31.2. HRMS (ESI): calculated for  $\text{C}_{25}\text{H}_{23}\text{O}_2\text{Se}$   $[\text{M}+\text{H}]^+$  435.0858, found 435.0858.

**3-phenyl-4-((4-(trifluoromethyl)phenyl)selanyl)-1H-isochromen-1-one (3ha)**

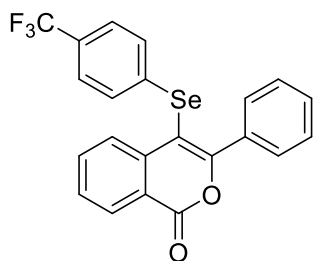

White solid (92 mg, 69% yield); mp 91.9-92.0 °C; EtOAc/PE = 1/40.  $^1\text{H}$  NMR (500 MHz,  $\text{CDCl}_3$ )  $\delta$  8.39-8.38 (m, 1H), 7.97-7.95 (m, 1H), 7.74-7.71 (m, 1H), 7.64-7.62 (m, 2H), 7.58-7.55 (m, 1H), 7.45-7.39 (m, 5H), 7.30-7.29 (m, 2H);  $^{13}\text{C}$  NMR (125

MHz, CDCl<sub>3</sub>)  $\delta$  161.4, 160.3, 138.0, 137.2, 135.6, 133.8, 130.4, 130.0, 129.5, 129.0, 128.7 (q,  $J = 32.5$  Hz), 128.5, 127.9, 127.8, 126.2 (q,  $J = 3.8$  Hz), 124.0 (q,  $J = 270.0$  Hz), 120.9, 103.8. <sup>19</sup>F NMR (470 MHz, CDCl<sub>3</sub>)  $\delta$  -62.6 (s, 1F). HRMS (ESI): calculated for C<sub>22</sub>H<sub>14</sub>O<sub>2</sub>Se [M+H]<sup>+</sup> 447.0106, found 447.0106.

#### 4-((3-methoxyphenyl)selanyl)-3-phenyl-1H-isochromen-1-one (3ia)

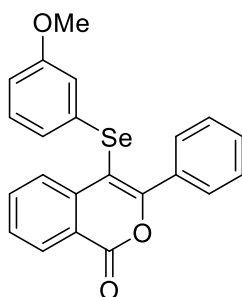

White solid (50 mg, 41% yield); mp 96.2-96.4 °C; EtOAc/PE = 1/40. <sup>1</sup>H NMR (500 MHz, CDCl<sub>3</sub>)  $\delta$  8.37-8.35 (m, 1H), 8.06-8.05 (m, 1H), 7.73-7.67 (m, 3H), 7.55-7.52 (m, 1H), 7.44-7.39 (m, 3H), 7.12-7.09 (m, 1H), 6.80-6.78 (m, 1H), 6.76 (s, 1H), 6.71-6.69 (m, 1H), 3.69 (s, 3H); <sup>13</sup>C NMR (125 MHz, CDCl<sub>3</sub>)  $\delta$  161.6, 160.2, 159.7, 138.5, 135.4, 134.1, 133.0, 130.3, 130.1, 129.7, 128.7, 128.3, 127.8, 121.1, 120.8, 114.7, 112.0, 104.7, 55.2. HRMS (ESI): calculated for C<sub>22</sub>H<sub>17</sub>O<sub>3</sub>Se [M+H]<sup>+</sup> 409.0338, found 409.0330.

#### 3-phenyl-4-(m-tolylselanyl)-1H-isochromen-1-one (3ja)

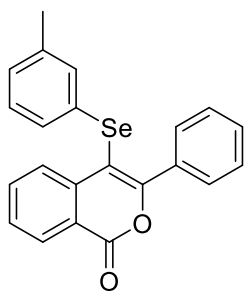

White solid (92 mg, 78% yield); mp 86.4-86.8 °C; EtOAc/PE = 1/40. <sup>1</sup>H NMR (500 MHz, CDCl<sub>3</sub>)  $\delta$  8.37-8.36 (m, 1H), 8.07-8.06 (m, 1H), 7.73-7.67 (m, 3H), 7.55-7.52 (m, 1H), 7.44-7.39 (m, 3H), 7.08-7.03 (m, 2H), 6.99-6.96 (m, 2H), 2.24 (s, 3H); <sup>13</sup>C NMR (125 MHz, CDCl<sub>3</sub>)  $\delta$  161.7, 159.5, 139.3, 138.6, 135.3, 134.1, 131.6, 130.1, 129.7, 129.6, 129.5, 129.3, 128.7, 128.3, 127.8, 127.4, 126.0, 120.9, 104.9, 21.3. HRMS (ESI): calculated for C<sub>22</sub>H<sub>17</sub>O<sub>2</sub>Se [M+H]<sup>+</sup> 393.0389, found 393.0392.

#### 4-((3-chlorophenyl)selanyl)-3-phenyl-1H-isochromen-1-one (3ka)

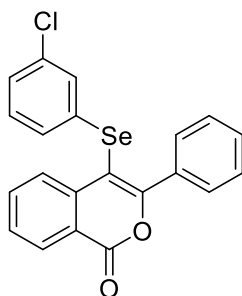

White solid (105 mg, 85% yield); mp 92.0-93.3 °C; EtOAc/PE = 1/40. <sup>1</sup>H NMR (500 MHz, CDCl<sub>3</sub>) δ 8.38-8.37 (m, 1H), 8.01-8.00 (m, 1H), 7.75-7.72 (m, 1H), 7.65-7.63 (m, 2H), 7.57-7.54 (m, 1H), 7.47-7.40 (m, 3H), 7.18 (s, 1H), 7.14-7.04 (m, 3H), ; <sup>13</sup>C NMR (125 MHz, CDCl<sub>3</sub>) δ 161.5, 160.0, 138.1, 135.5, 135.3, 133.9, 133.5, 130.4, 129.9, 129.6, 128.9, 128.6, 128.0, 127.9, 126.9, 126.8, 120.9, 104.4. HRMS (ESI): calculated for C<sub>21</sub>H<sub>13</sub>ClO<sub>2</sub>Se [M+H]<sup>+</sup> 412.9842, found 412.9848.

#### 3-phenyl-4-(o-tolylselanyl)-1H-isochromen-1-one (3la)

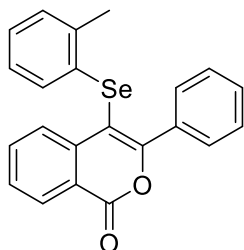

White solid (93 mg, 79% yield); mp 114.8-115.4 °C; EtOAc/ PE = 1/40. <sup>1</sup>H NMR (500 MHz, CDCl<sub>3</sub>) δ 8.39-8.38 (m, 1H), 7.96-7.95 (m, 1H), 7.71-7.66 (m, 3H), 7.56-7.53 (m, 1H), 7.45-7.37 (m, 3H), 7.17-7.15 (m, 1H), 7.11-7.08 (m, 1H), 6.97-6.96 (m, 2H), 2.36 (s, 3H); <sup>13</sup>C NMR (125 MHz, CDCl<sub>3</sub>) δ 161.7, 159.7, 138.5, 136.5, 135.4, 134.1, 132.7, 130.4, 130.1, 129.7, 129.6, 128.7, 128.3, 127.9, 127.8, 127.1, 126.2, 120.9, 104.1, 21.3. HRMS (ESI): calculated for C<sub>22</sub>H<sub>17</sub>O<sub>2</sub>Se [M+H]<sup>+</sup> 393.0389, found 393.0382.

#### 4-((2-chlorophenyl)selanyl)-3-phenyl-1H-isochromen-1-one (3ma)



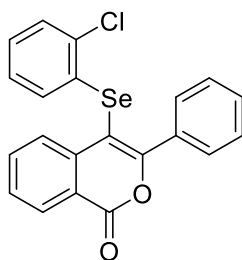

White solid (86 mg, 70% yield); EtOAc/PE = 1/40.  $^1\text{H}$  NMR (500 MHz,  $\text{CDCl}_3$ )  $\delta$  8.39-8.38 (m, 1H), 7.94-7.92 (m, 1H), 7.72-7.69 (m, 1H), 7.65-7.64 (m, 2H), 7.57-7.54 (m, 1H), 7.45-7.37 (m, 3H), 7.35-7.33 (m, 1H), 7.13-7.10 (m, 1H), 7.04-7.01 (m, 1H), 6.92-6.90 (m, 1H);  $^{13}\text{C}$  NMR (125 MHz,  $\text{CDCl}_3$ )  $\delta$  161.5, 160.4, 138.1, 135.6, 133.8, 132.7, 132.5, 130.3, 129.8, 129.7, 129.5, 128.9, 128.7, 128.0, 127.9, 127.7, 127.2, 120.9, 103.7.

#### 4-(mesitylselanyl)-3-phenyl-1H-isochromen-1-one (3na)

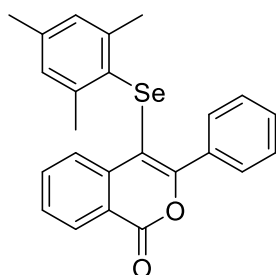

White solid (89 mg, 71% yield); mp 101.6-102.1 °C; EtOAc/PE = 1/40.  $^1\text{H}$  NMR (500 MHz,  $\text{CDCl}_3$ )  $\delta$  8.33-8.31 (m, 1H), 7.84-7.83 (m, 1H), 7.65-7.62 (m, 1H), 7.51-7.46 (m, 3H), 7.45-7.37 (m, 3H), 6.71 (s, 2H), 2.18 (s, 6H), 2.16 (s, 3H);  $^{13}\text{C}$  NMR (125 MHz,  $\text{CDCl}_3$ )  $\delta$  161.9, 156.1, 141.1, 138.6, 137.7, 134.8, 134.2, 129.8, 129.7, 129.6, 129.1, 128.4, 128.1, 127.7, 127.3, 120.7, 107.3, 23.7, 20.7. HRMS (ESI): calculated for  $\text{C}_{24}\text{H}_{21}\text{O}_2\text{Se}$   $[\text{M}+\text{H}]^+$  421.0702, found 421.0707.

#### 4-(naphthalen-2-ylselanyl)-3-phenyl-1H-isochromen-1-one (3oa)

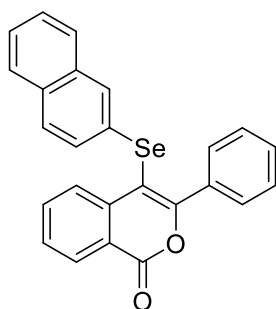

White solid (59 mg, 46% yield); mp 103.5-104.1 °C; EtOAc/PE = 1/40. <sup>1</sup>H NMR (500 MHz, CDCl<sub>3</sub>) δ 8.40-8.39 (m, 1H), 8.10-8.09 (m, 1H), 7.77-7.76 (m, 1H), 7.73-7.72 (m, 2H), 7.69-7.63 (m, 4H), 7.54-7.51 (m, 1H), 7.46-7.39 (m, 5H), 7.33-7.30 (m, 1H); <sup>13</sup>C NMR (125 MHz, CDCl<sub>3</sub>) δ 161.7, 159.8, 138.5, 135.4, 134.1, 134.0, 132.0, 130.2, 129.8, 129.7, 129.4, 129.0, 128.8, 128.3, 127.9, 127.8, 127.3, 127.1, 126.7, 126.6, 125.9, 120.9, 104.7. HRMS (ESI): calculated for C<sub>25</sub>H<sub>17</sub>O<sub>2</sub>Se [M+H]<sup>+</sup> 429.0389, found 429.0396.

### 3-phenyl-4-(thiophen-3-ylselanyl)-1H-isochromen-1-one (3pa)

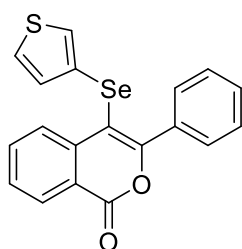

White solid (61mg, 53% yield); mp 95.5-97.2 °C; EtOAc/PE = 1/40. <sup>1</sup>H NMR (500 MHz, CDCl<sub>3</sub>) δ 8.35-8.33 (m, 1H), 8.17-8.16 (m, 1H), 7.76-7.73 (m, 1H), 7.66-7.65 (m, 2H), 7.55-7.52 (m, 1H), 7.45-7.41 (m, 3H), 7.25-7.22 (m, 1H), 6.96 (s, 1H), 6.83-6.82 (m, 1H); <sup>13</sup>C NMR (125 MHz, CDCl<sub>3</sub>) δ 161.6, 158.9, 138.5, 135.2, 134.1, 130.1, 129.9, 129.7, 129.5, 128.7, 128.2, 127.8, 126.7, 124.1, 123.8, 120.9, 105.8. HRMS (ESI): calculated for C<sub>19</sub>H<sub>13</sub>SO<sub>2</sub>Se [M+H]<sup>+</sup> 384.9796, found 384.9796.

### 3-(4-methoxyphenyl)-4-(phenylselanyl)-1H-isochromen-1-one (3ab) <sup>[4]</sup>

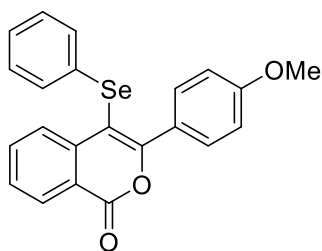

White solid (95 mg, 78% yield); EtOAc/PE = 1/40. <sup>1</sup>H NMR (500 MHz, CDCl<sub>3</sub>) δ 8.35-8.34 (m, 1H), 8.04-8.02 (m, 1H), 7.70-7.65 (m, 3H), 7.52-7.49 (m, 1H), 7.20-7.15 (m, 5H), 6.92-6.90 (m, 2H), 3.84 (s, 3H); <sup>13</sup>C NMR (125 MHz, CDCl<sub>3</sub>) δ 161.8, 161.1, 159.5, 138.8, 135.3, 132.0, 131.4, 129.6, 129.5, 128.7, 128.4, 128.2, 126.4, 126.3, 120.7, 113.2, 103.8, 55.3.

### 3-(4-nitrophenyl)-4-(phenylselanyl)-1H-isochromen-1-one (3ac)

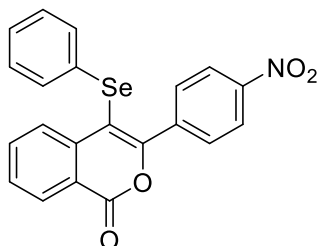

Yellow solid (82 mg, 65% yield); mp 106.7-107.4 °C; EtOAc/PE = 1/40. <sup>1</sup>H NMR (500 MHz, CDCl<sub>3</sub>) δ 8.37-8.36 (m, 1H), 8.23-8.21 (m, 2H), 8.10-8.09 (m, 1H), 7.84-7.83 (m, 2H), 7.77-7.74 (m, 1H), 7.61-7.58 (m, 1H), 7.19-7.18 (m, 5H); <sup>13</sup>C NMR (125 MHz, CDCl<sub>3</sub>) δ 160.9, 156.8, 148.4, 139.9, 137.9, 135.7, 131.2, 130.8, 129.9, 129.8, 129.5, 129.0, 128.5, 127.0, 123.0, 121.0, 106.8. HRMS (ESI): calculated for C<sub>21</sub>H<sub>14</sub>NO<sub>4</sub>Se [M+H]<sup>+</sup> 424.0083, found 424.0076.

### 4-(phenylselanyl)-3-(p-tolyl)-1H-isochromen-1-one (3ad) <sup>[4]</sup>

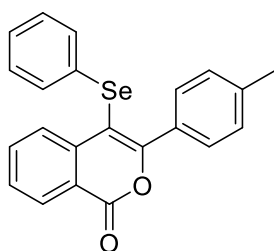

White solid (82 mg, 70% yield); EtOAc/PE = 1/40. <sup>1</sup>H NMR (500 MHz, CDCl<sub>3</sub>) δ 8.37-8.35 (m, 1H), 8.05-8.03 (m, 1H), 7.71-7.68 (m, 1H), 7.59-7.57 (m, 2H), 7.54-7.51 (m, 1H), 7.22-7.15 (m, 7H), 2.40 (s, 3H); <sup>13</sup>C NMR (125 MHz, CDCl<sub>3</sub>) δ 161.8, 159.8, 140.4, 138.6, 135.3, 132.0, 131.2, 129.7, 129.6, 129.5, 128.8, 128.5, 128.4, 128.2, 126.4, 120.8, 104.3, 21.5.

### 3-(naphthalen-2-yl)-4-(phenylselanyl)-1H-isochromen-1-one (3ae)

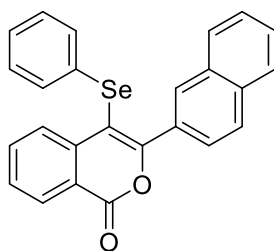

White solid (114 mg, 89% yield); mp 94.9-96.3 °C; EtOAc/PE = 1/40. <sup>1</sup>H NMR (500 MHz, CDCl<sub>3</sub>) δ 8.40-8.39 (m, 1H), 8.17 (s, 1H), 8.12-8.10 (m, 1H), 7.87-7.82 (m, 3H),

7.78-7.72 (m, 2H), 7.57-7.51 (m, 3H), 7.24-7.18 (m, 5H);  $^{13}\text{C}$  NMR (125 MHz,  $\text{CDCl}_3$ )  $\delta$  161.7, 159.6, 138.6, 135.4, 133.9, 132.3, 132.0, 131.4, 130.1, 129.8, 129.5, 129.0, 128.8, 128.7, 128.3, 127.7, 127.4, 127.3, 126.6, 126.5, 126.4, 120.9, 105.2. HRMS (ESI): calculated for  $\text{C}_{25}\text{H}_{17}\text{O}_2\text{Se}$   $[\text{M}+\text{H}]^+$  429.0389, found 429.0386.

**6-chloro-3-phenyl-4-(phenylselanyl)-1H-isochromen-1-one (3af)** <sup>[4]</sup>

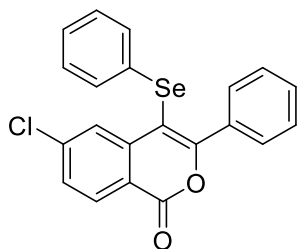

White solid (108 mg, 87% yield); EtOAc/PE = 1/40.  $^1\text{H}$  NMR (500 MHz,  $\text{CDCl}_3$ )  $\delta$  8.29-8.28 (m, 1H), 8.08 (s, 1H), 7.66-7.64 (m, 2H), 7.49-7.39 (m, 4H), 7.21-7.18 (m, 5H);  $^{13}\text{C}$  NMR (125 MHz,  $\text{CDCl}_3$ )  $\delta$  160.9, 160.8, 142.4, 140.3, 133.8, 131.4, 131.3, 130.4, 129.7, 129.6, 129.3, 129.2, 128.0, 127.9, 126.9, 119.2, 104.1.

**7-methoxy-3-phenyl-4-(phenylselanyl)-1H-isochromen-1-one (3ag)**

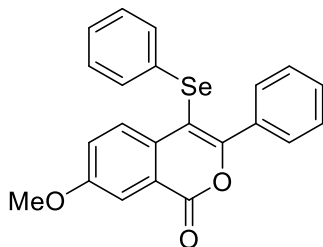

White solid (99 mg, 81% yield); mp 109.8-110.7 °C; EtOAc/PE = 1/40.  $^1\text{H}$  NMR (500 MHz,  $\text{CDCl}_3$ )  $\delta$  7.97-7.96 (m, 1H), 7.78-7.77 (m, 1H), 7.66-7.65 (m, 2H), 7.43-7.38 (m, 3H), 7.28-7.27 (m, 1H), 7.19-7.15 (m, 5H), 3.92 (s, 3H);  $^{13}\text{C}$  NMR (125 MHz,  $\text{CDCl}_3$ )  $\delta$  161.9, 159.9, 157.5, 134.0, 132.1, 131.9, 130.0, 129.9, 129.7, 129.5, 128.9, 127.8, 126.4, 124.6, 122.0, 110.3, 104.5, 55.8. HRMS (ESI): calculated for  $\text{C}_{22}\text{H}_{17}\text{O}_3\text{Se}$   $[\text{M}+\text{H}]^+$  409.0338, found 409.033.

Reference:

- [1] Lv, J. H.; Zhao, B.L.; Liu, L.; Han, Y.; Yuan, Y.; Shi, Z. Z. Boron Trichloride-Mediated Synthesis of Indoles via the Aminoboration of Alkynes.. *Adv. Synth. Catal.*, **2018**, 360, (21), 4054-4059.
- [2] Norseeda, K.; Chaisan, N.; Thongsornkleeb, C.; Tummatorn, J.; Ruchirawat. S. Metal-Free Synthesis of 4-Chloroisocoumarins by TMSCl-Catalyzed NCS-Induced Chlorinative Annulation of 2-Alkynylaryloate Esters. *J. Org. Chem.* 2019, 84, 16222-16236.
- [3] Dohi, T.; Koseki, D.; Sumida, K.; Okada, K.; Mizuno, S.; Kato, A.; Morimoto, K.; Kita. Y. Metal-Free O-Arylation of Carboxylic Acid by ActiveDiaryliodonium(III) Intermediates Generated in situ from Iodosoarenes. *Adv. Synth. Catal.* **2017**, 359, 3503-3508.
- [4] Speranca, A.; Godoi, B.; Pinton, S.; Back, D. F.; Menezes, P. H.; Zeni, G. Regioselective Synthesis of Isochromenones by Iron(III)/PhSeSePh Mediated Cyclization of 2-Alkynylaryl Esters. *J. Org. Chem.* 2011, 76, 6789-6797.

## 5. $^1\text{H}$ , $^{13}\text{C}$ and $^{19}\text{F}$ NMR spectra of products

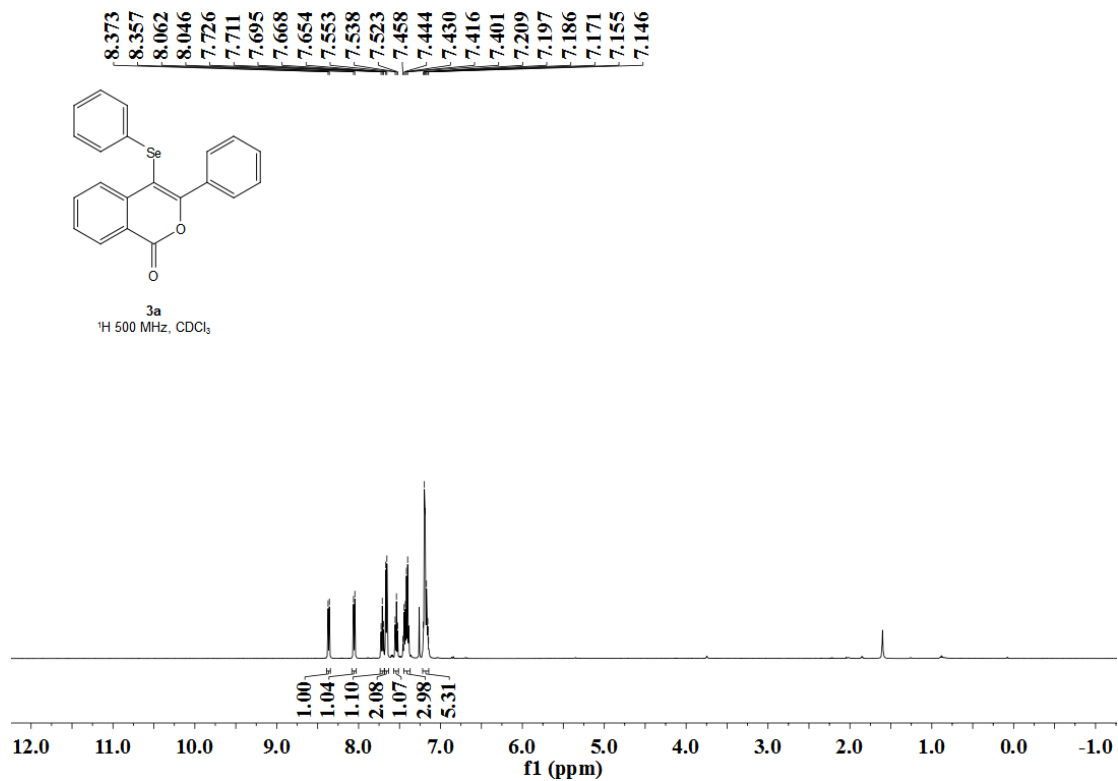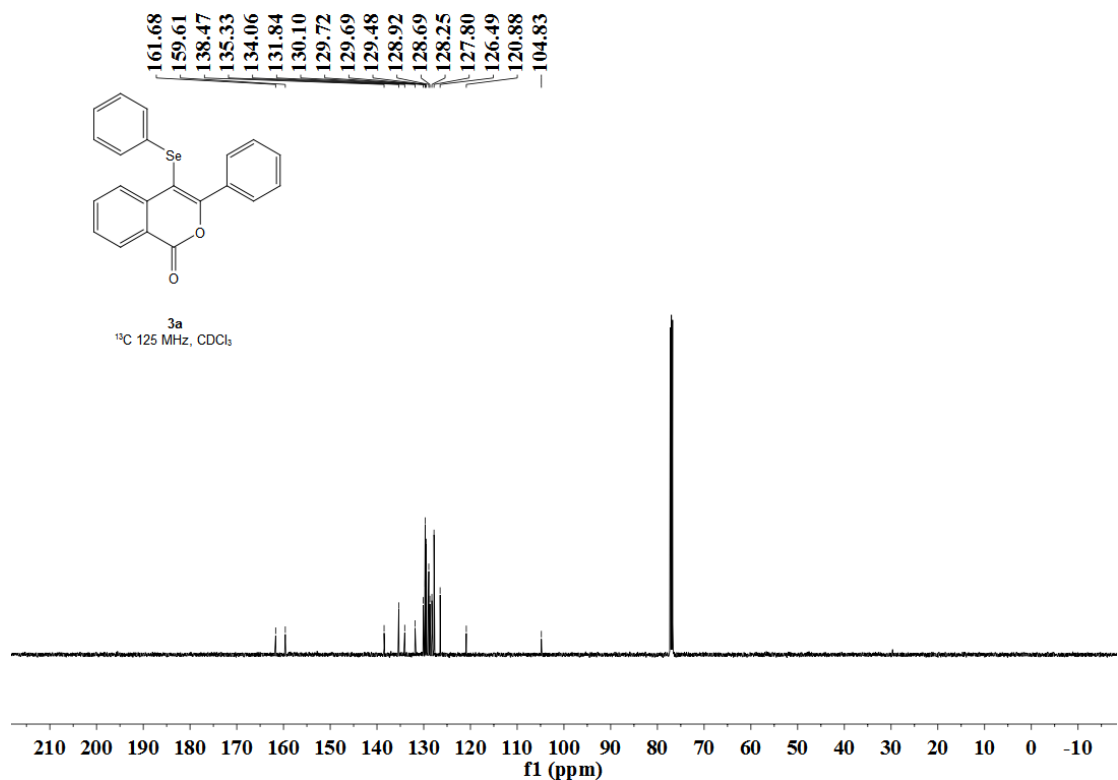

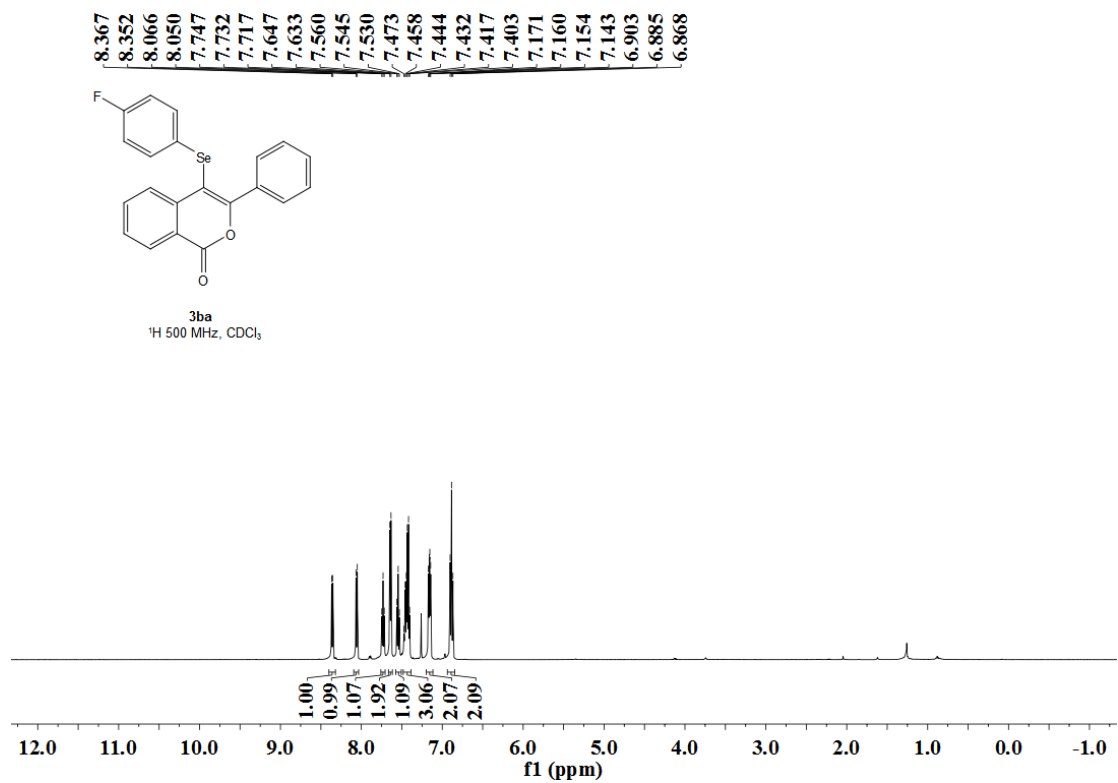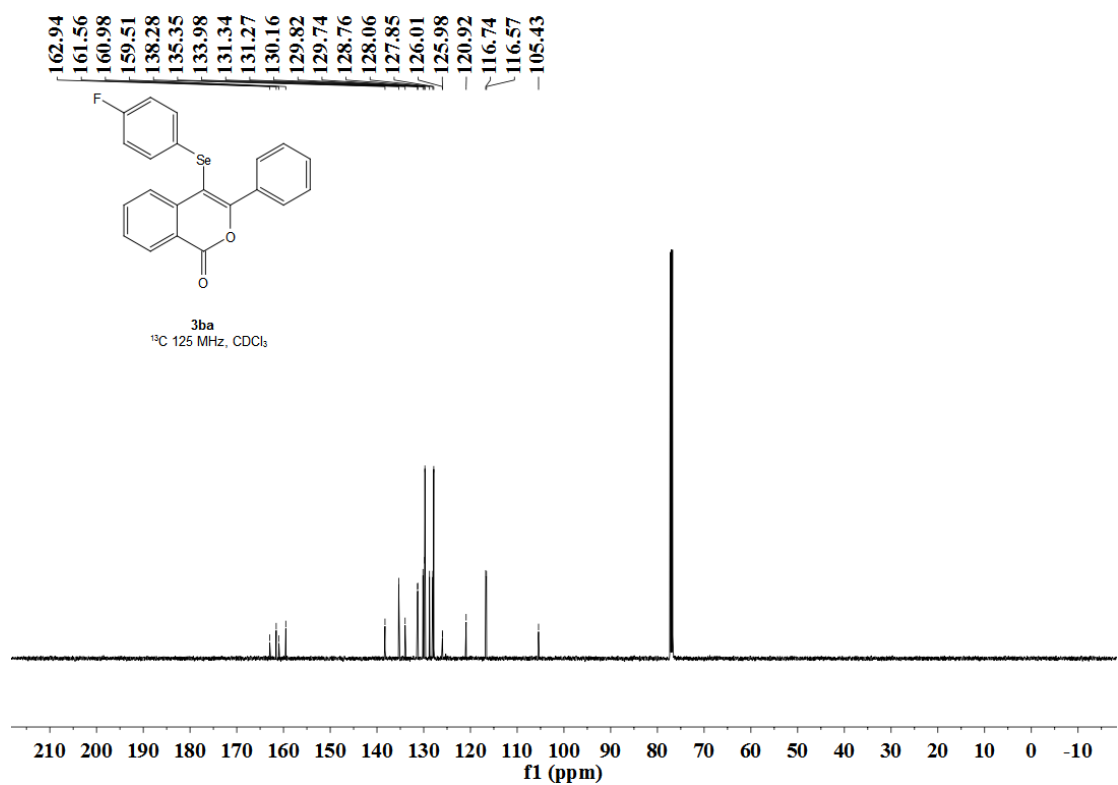

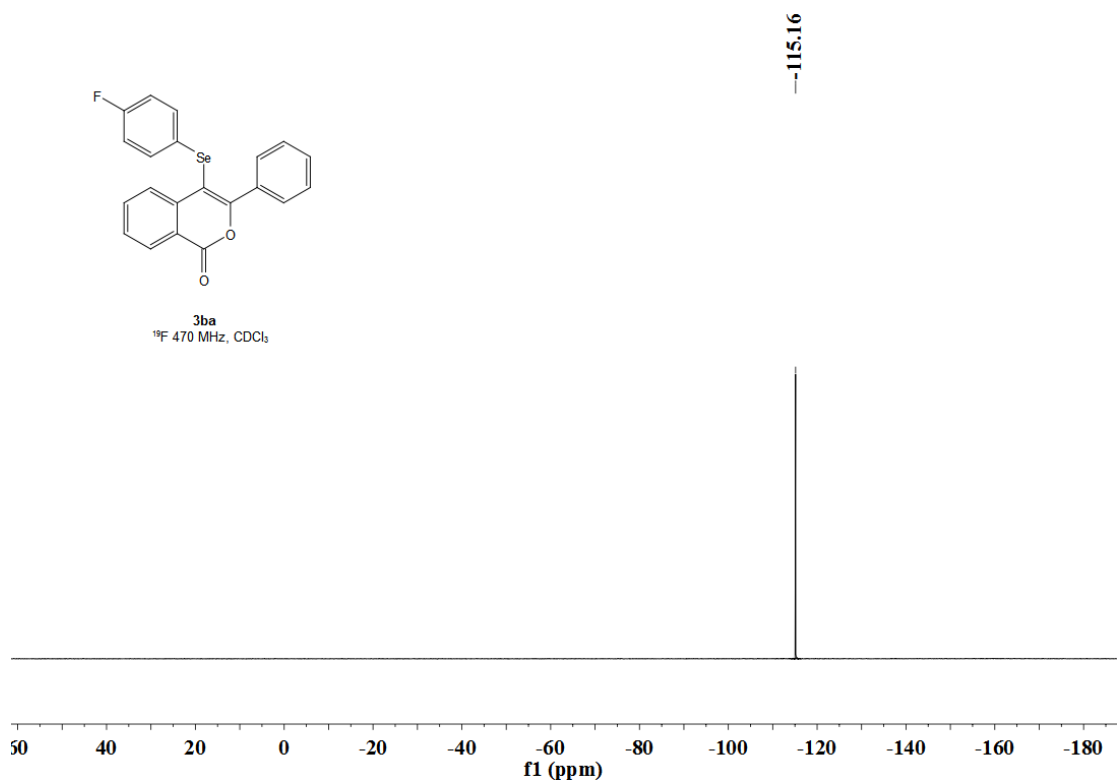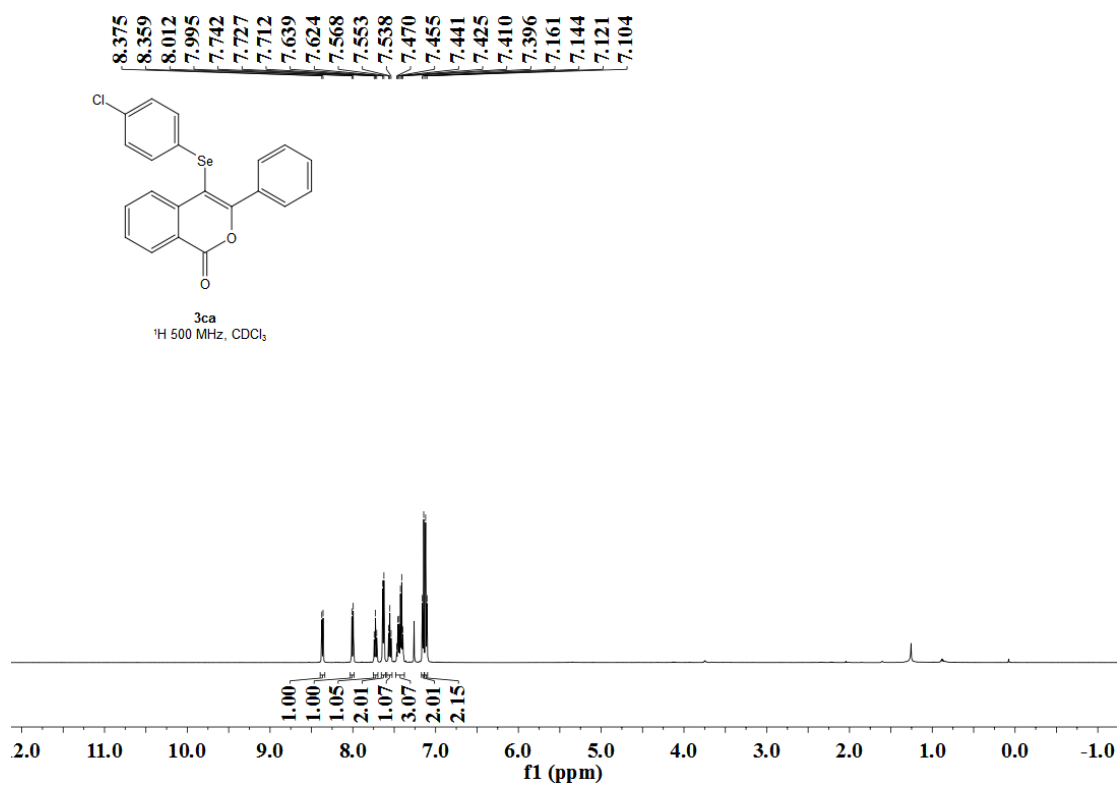



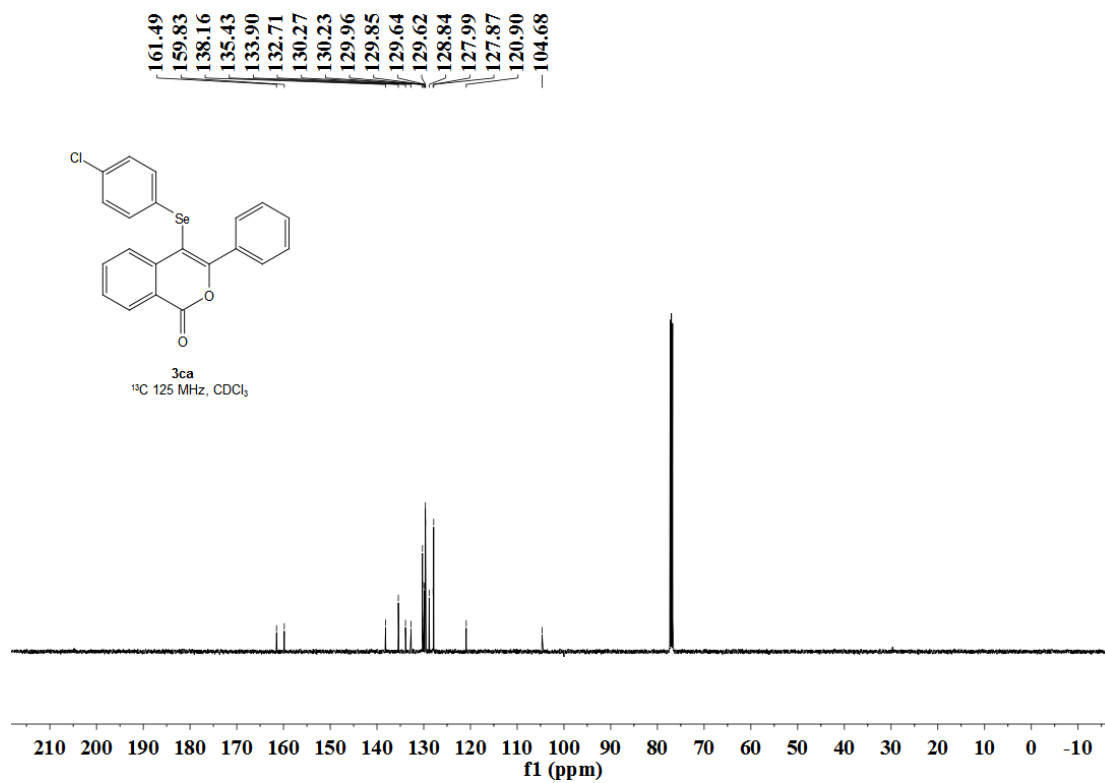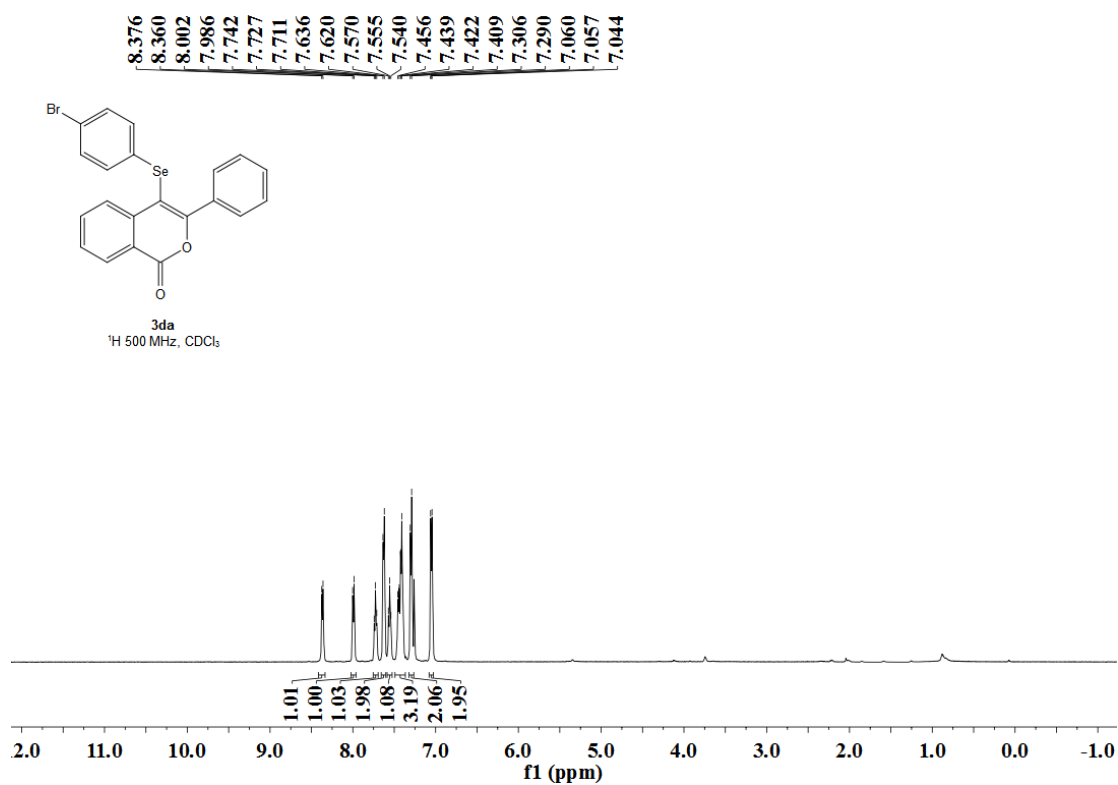

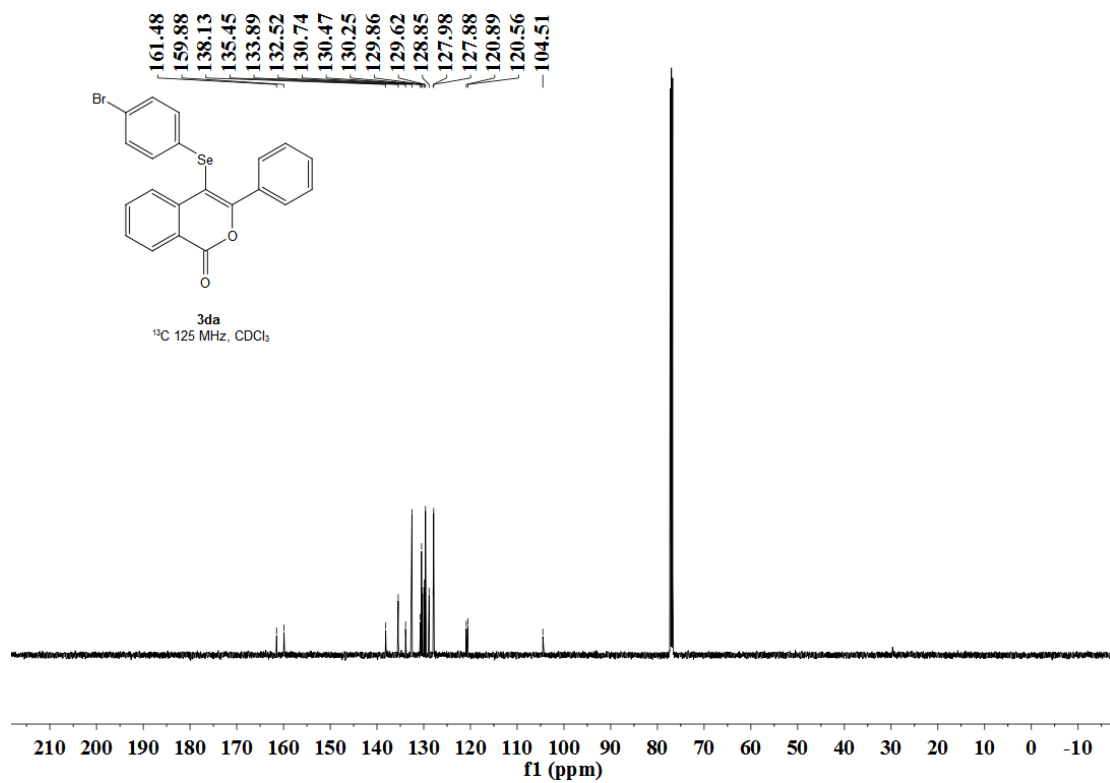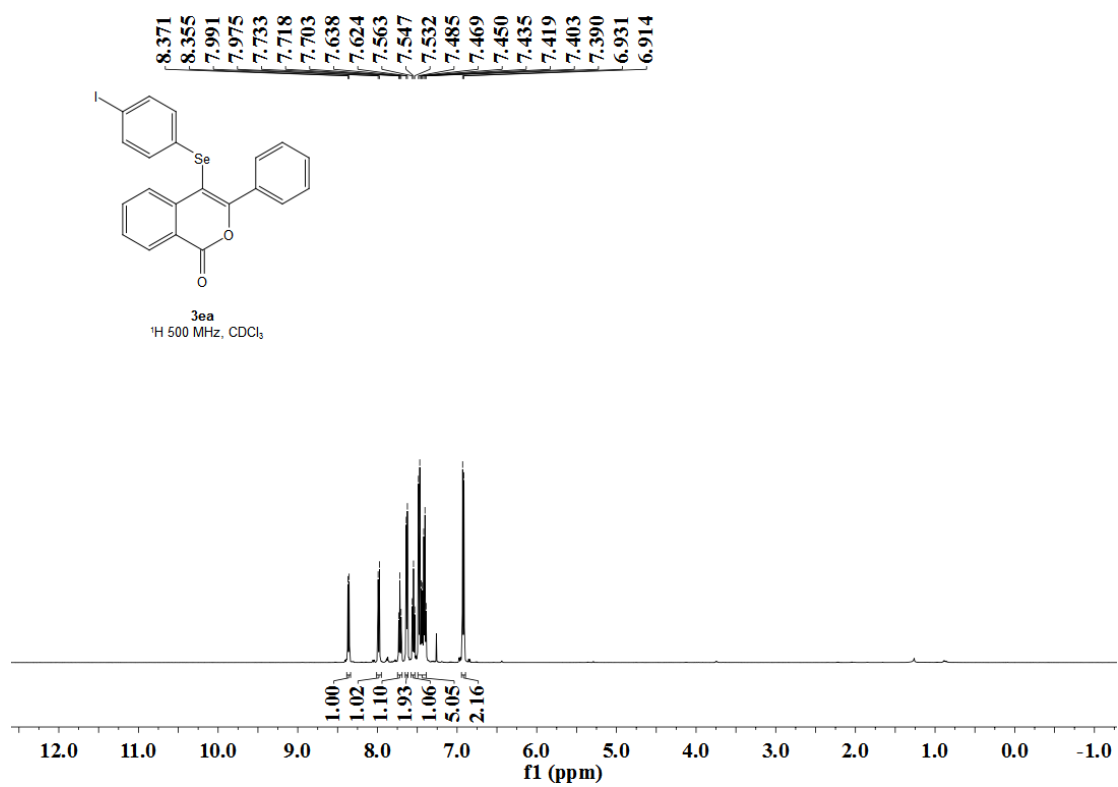

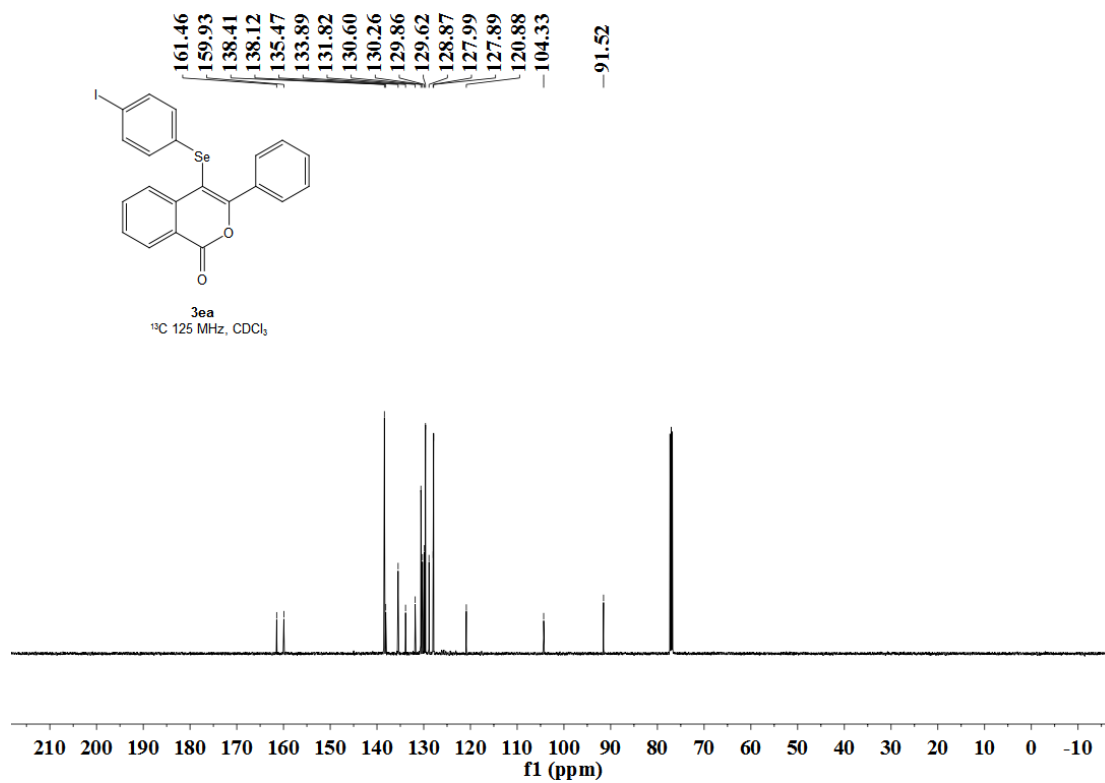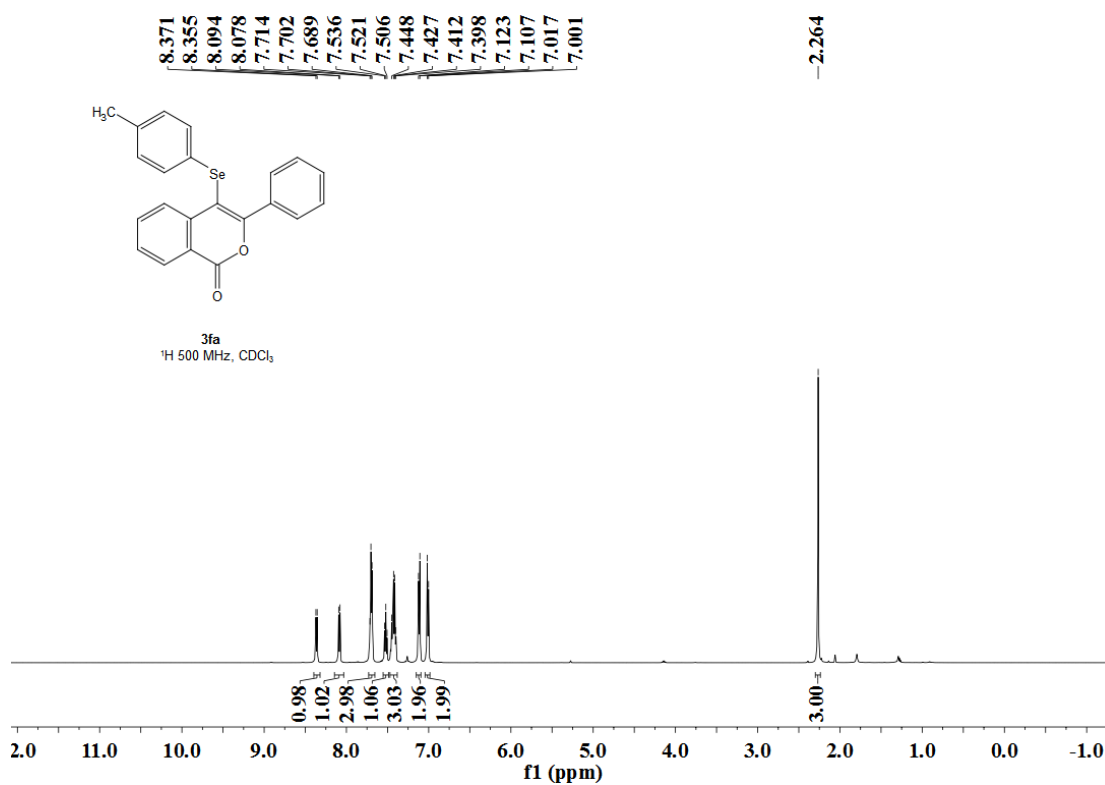

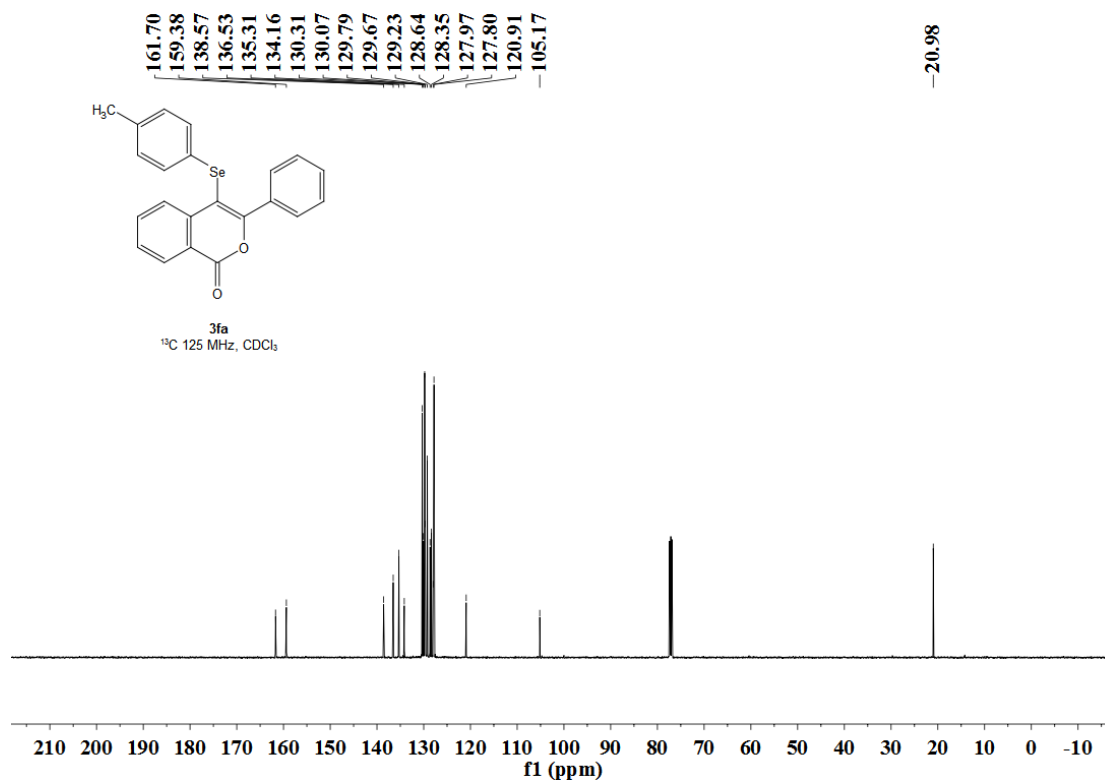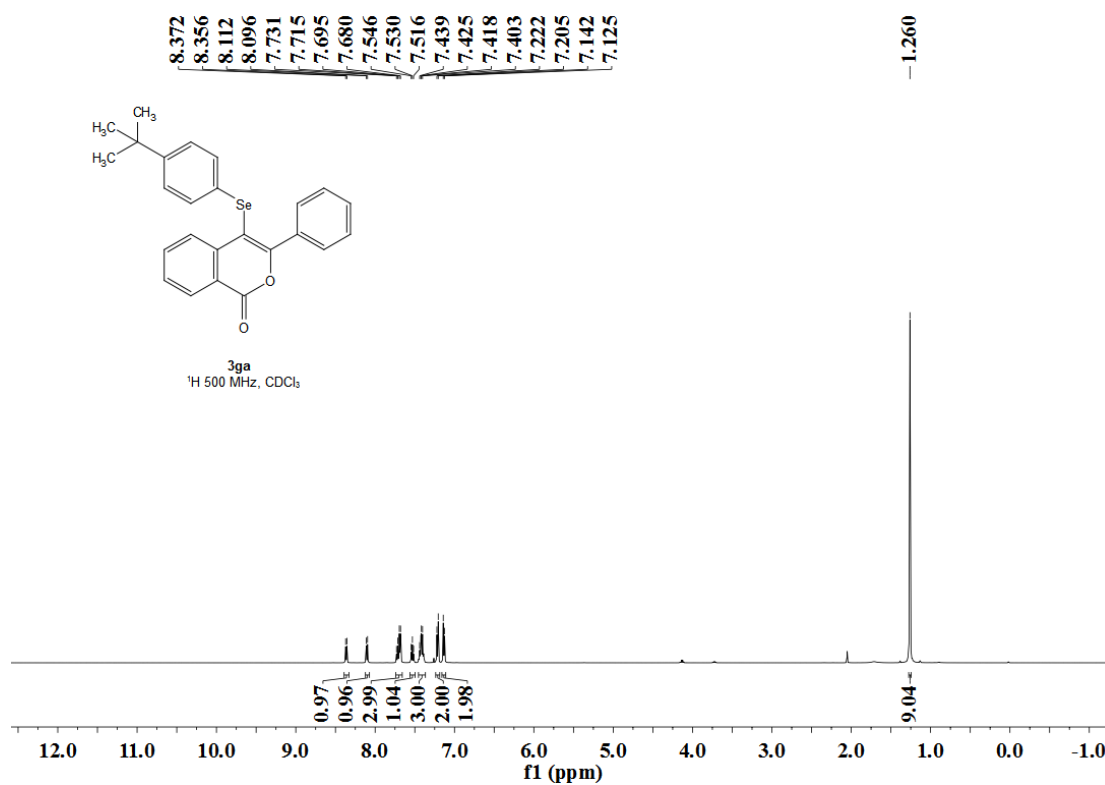

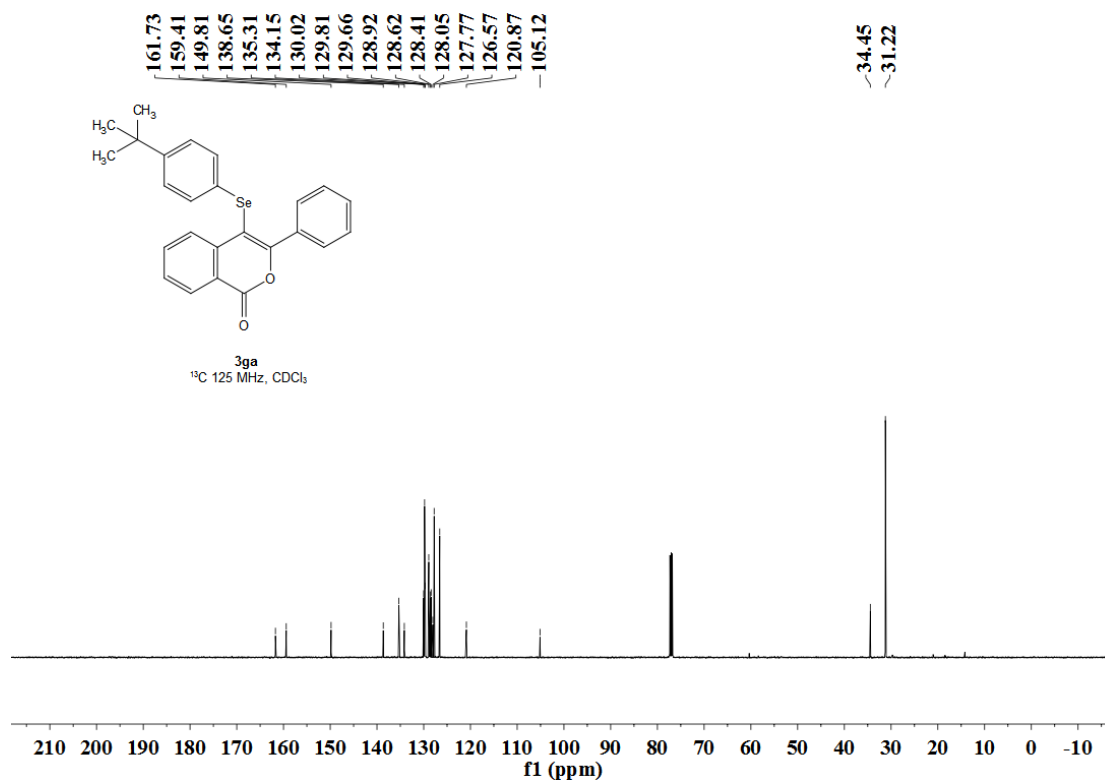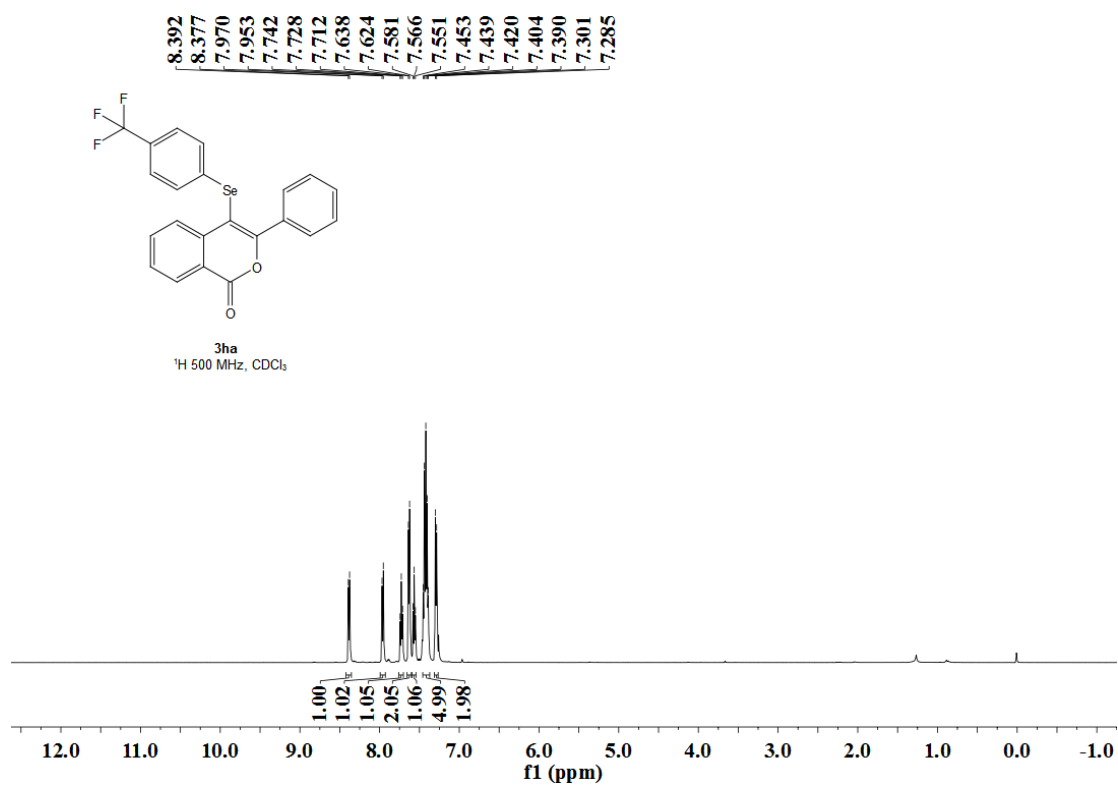

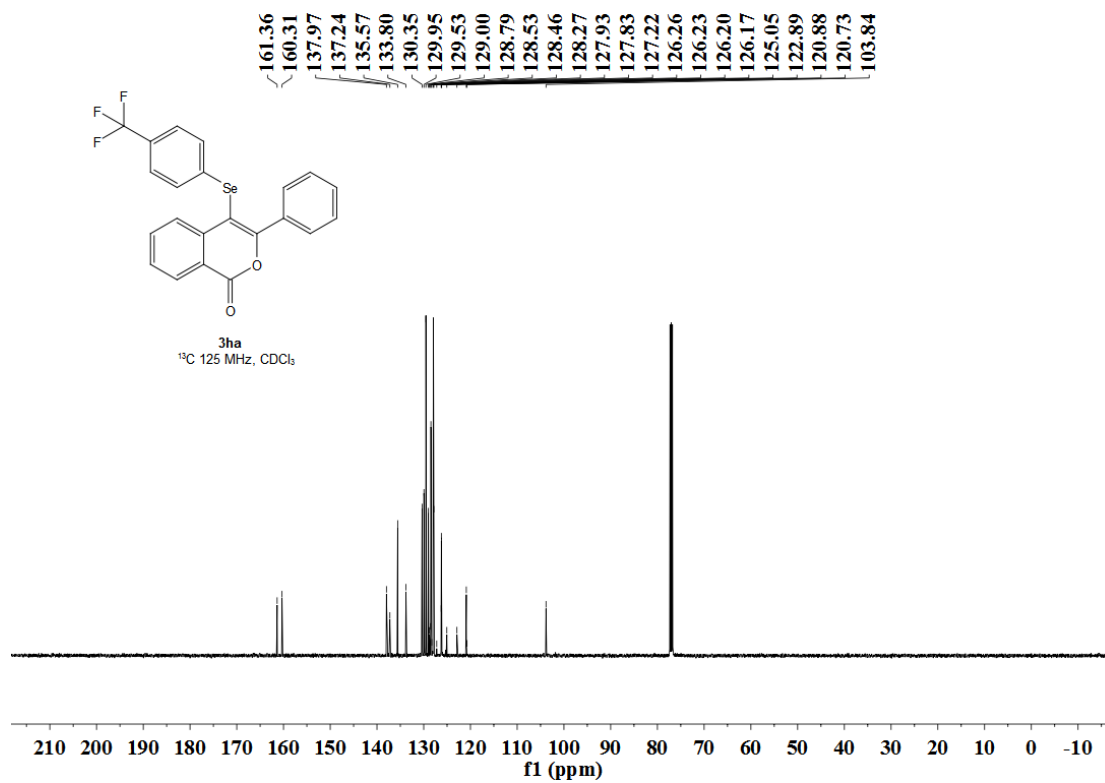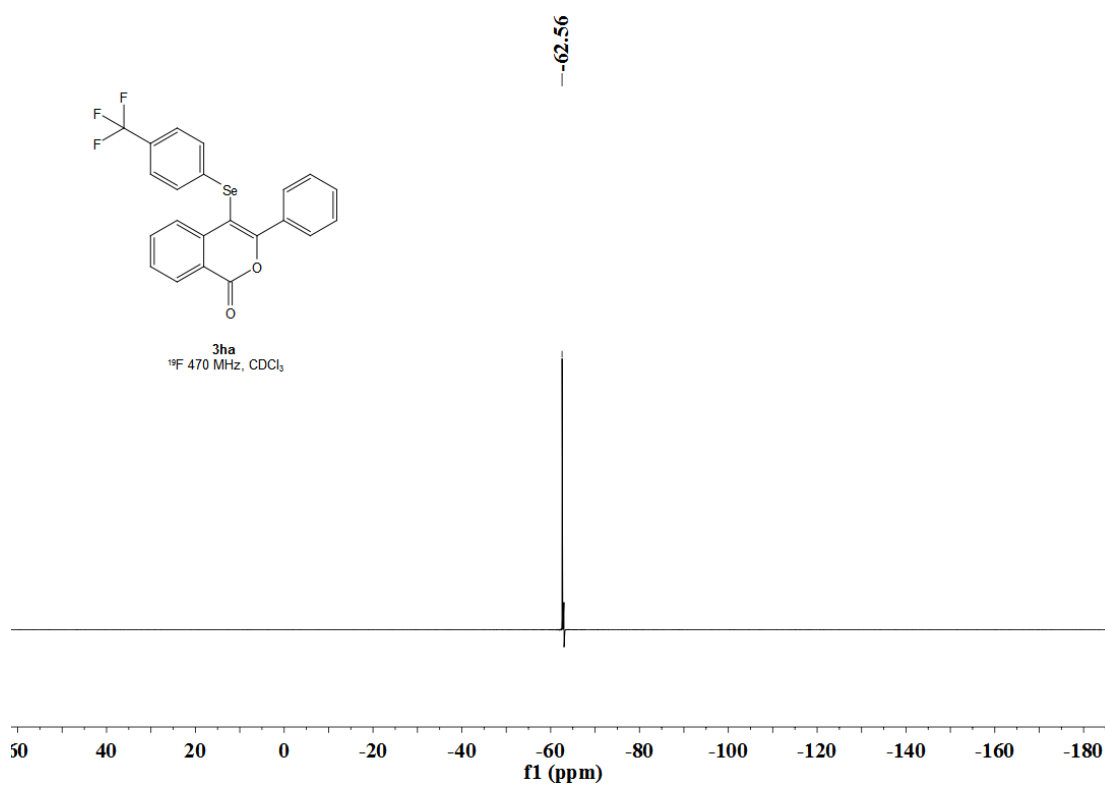

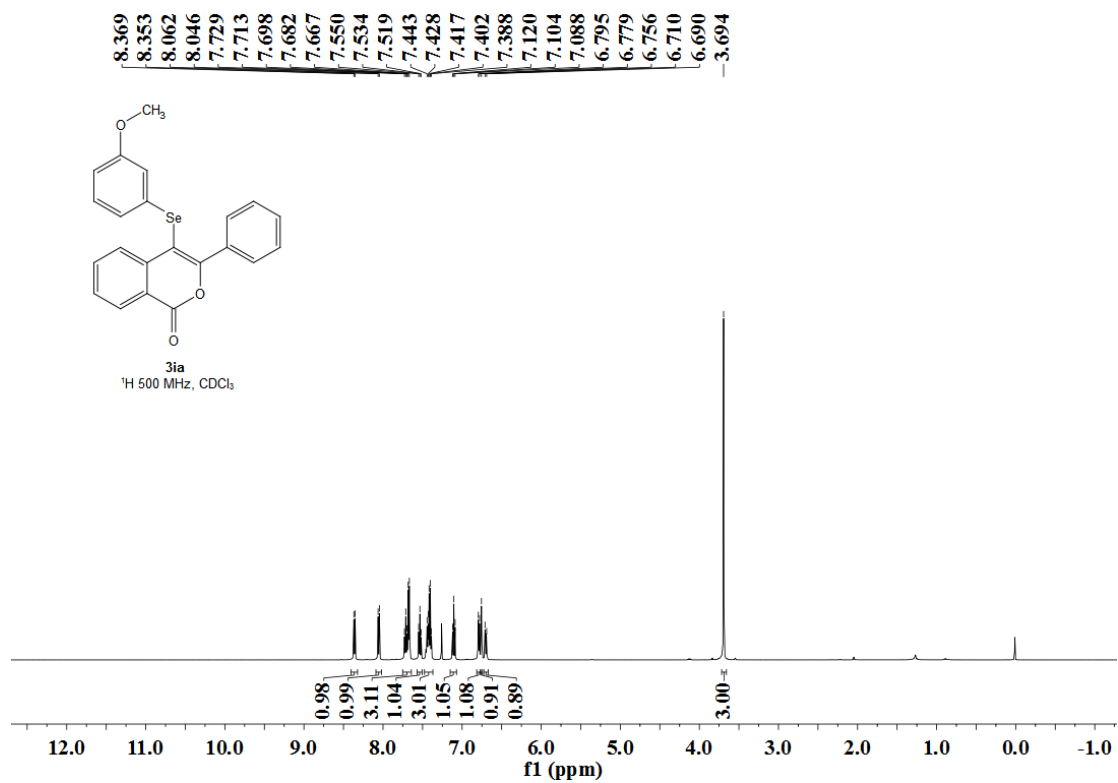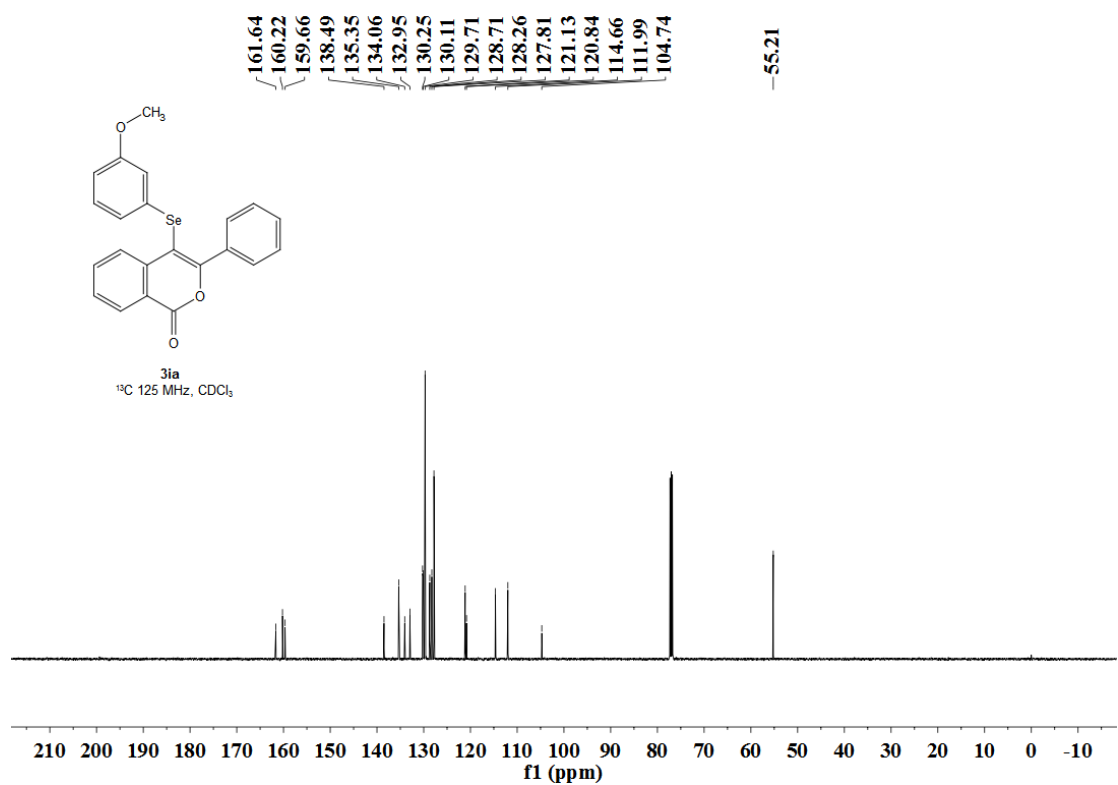

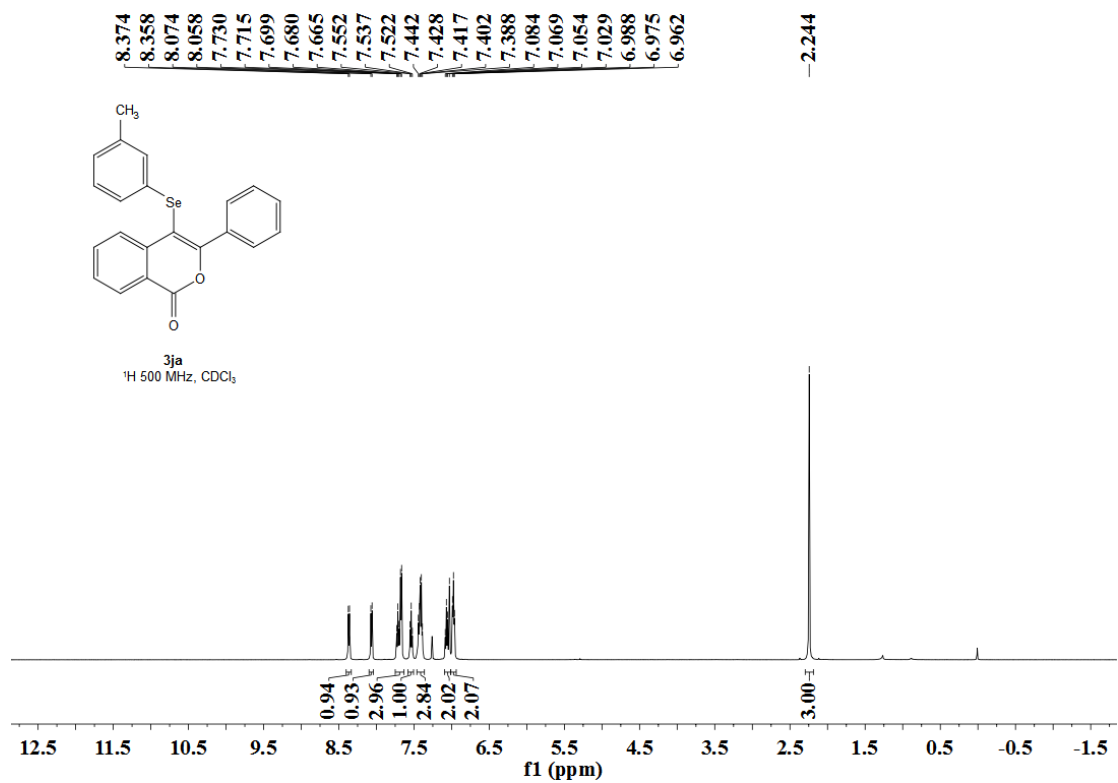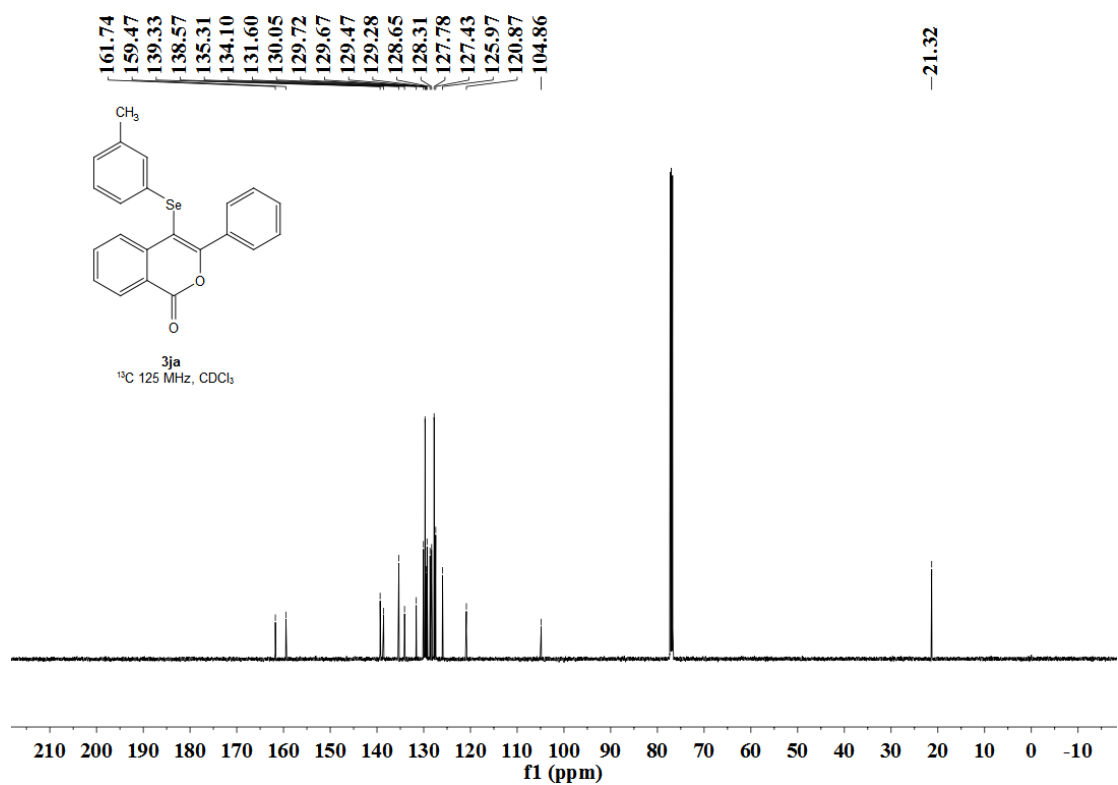



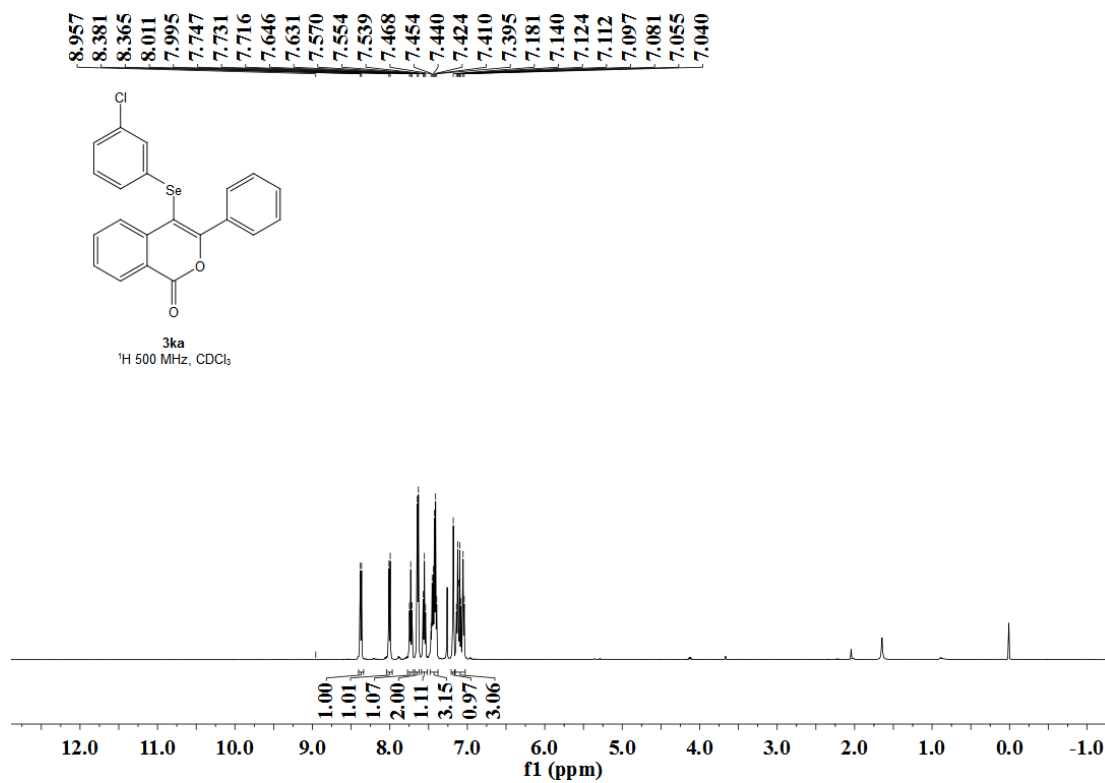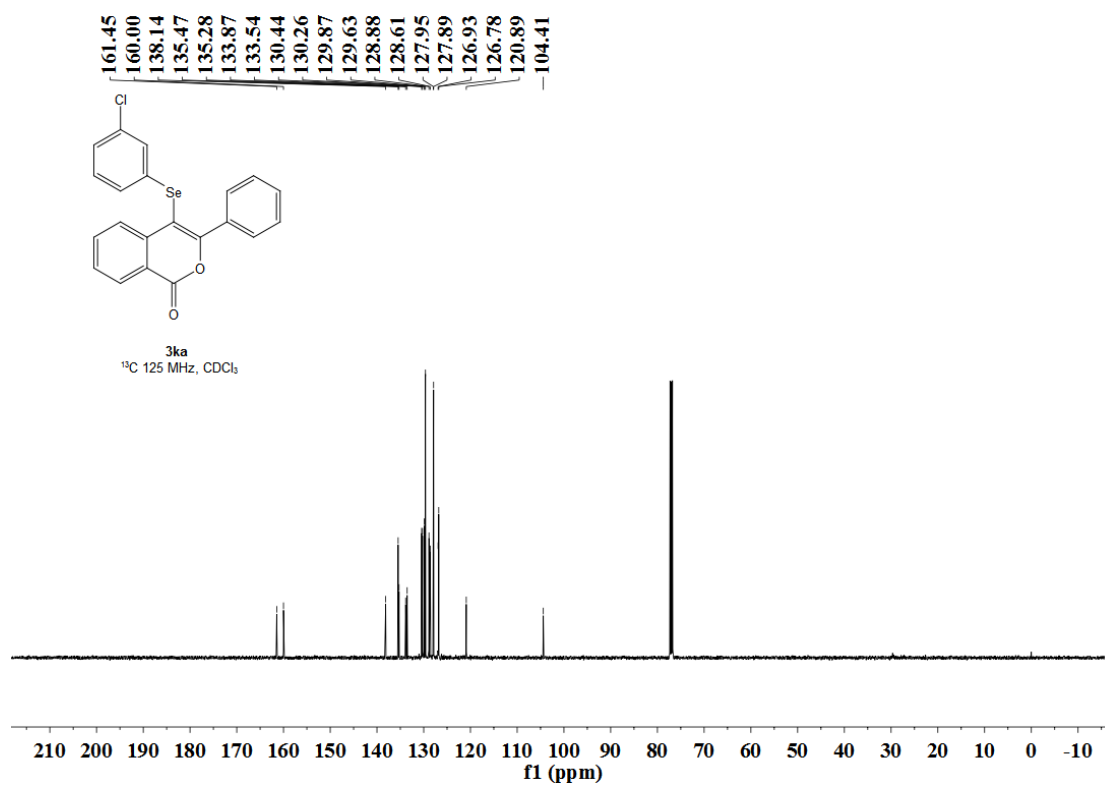

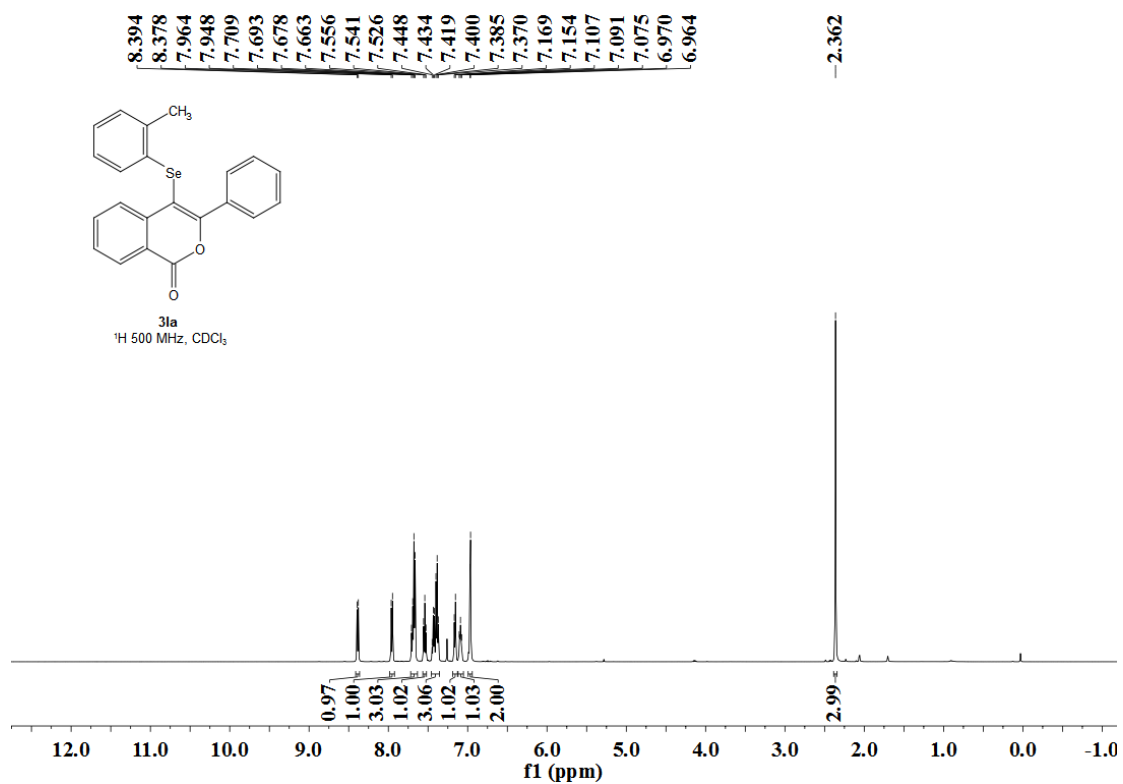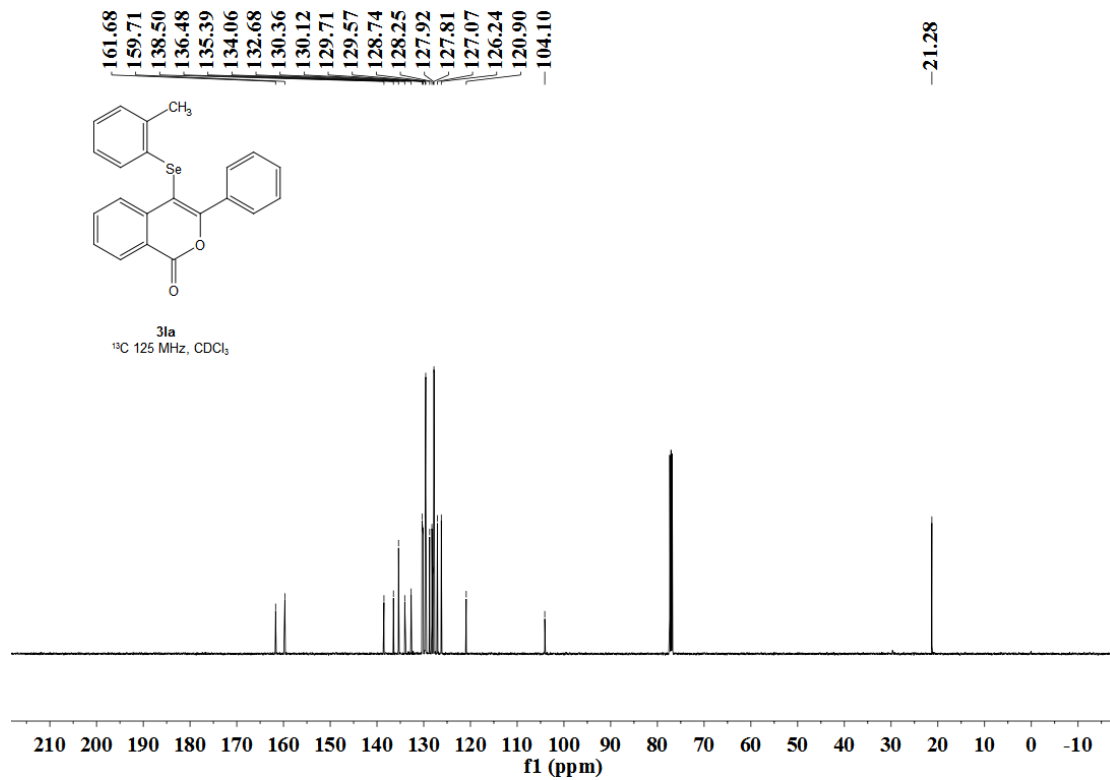

8.393  
8.377  
7.941  
7.924  
7.722  
7.707  
7.692  
7.652  
7.637  
7.571  
7.555  
7.540  
7.454  
7.439  
7.425  
7.404  
7.389  
7.374  
7.349  
7.333  
7.130  
7.115  
7.100  
7.043  
7.027  
7.012  
6.918  
6.902

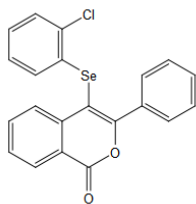

**3ma**  
<sup>1</sup>H 500 MHz, CDCl<sub>3</sub>

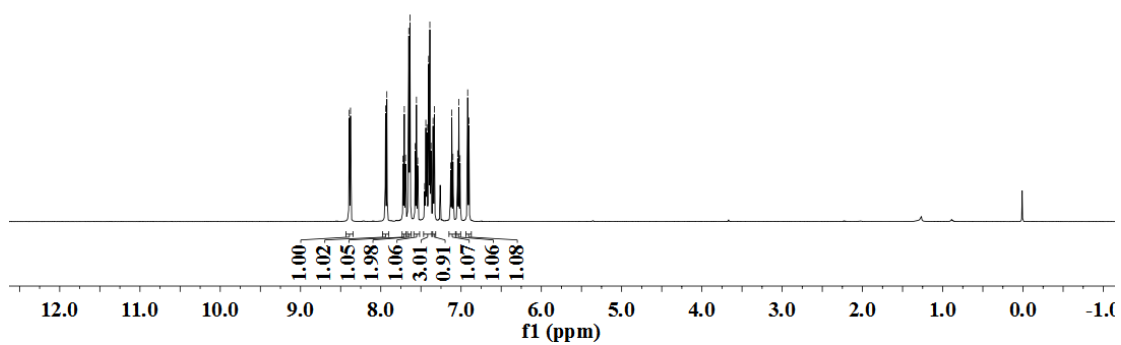

161.51  
160.38  
138.13  
135.55  
133.75  
132.67  
132.48  
130.31  
129.82  
129.68  
129.47  
128.91  
128.65  
128.04  
127.90  
127.73  
127.22  
120.88  
103.70

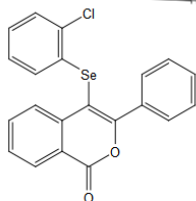

**3ma**  
<sup>13</sup>C 125 MHz, CDCl<sub>3</sub>

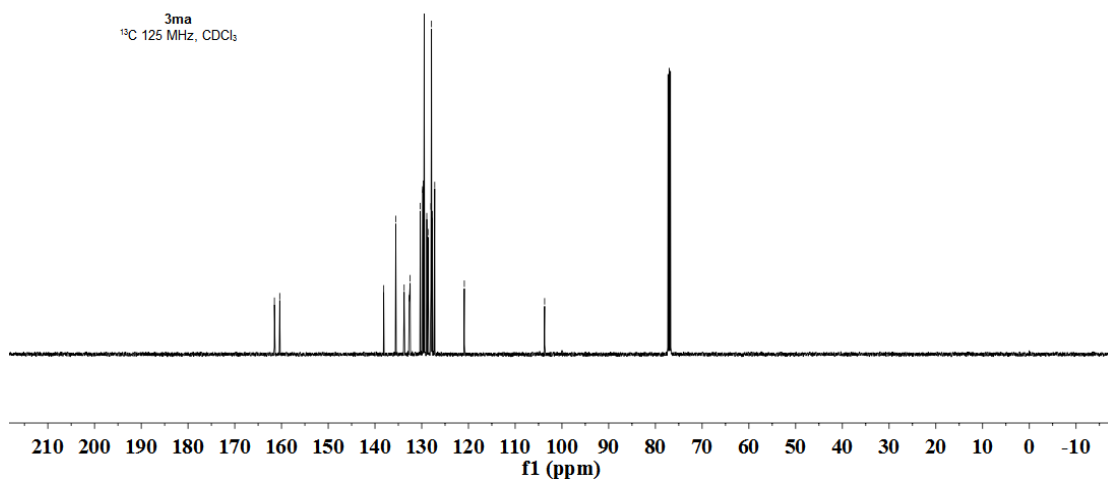

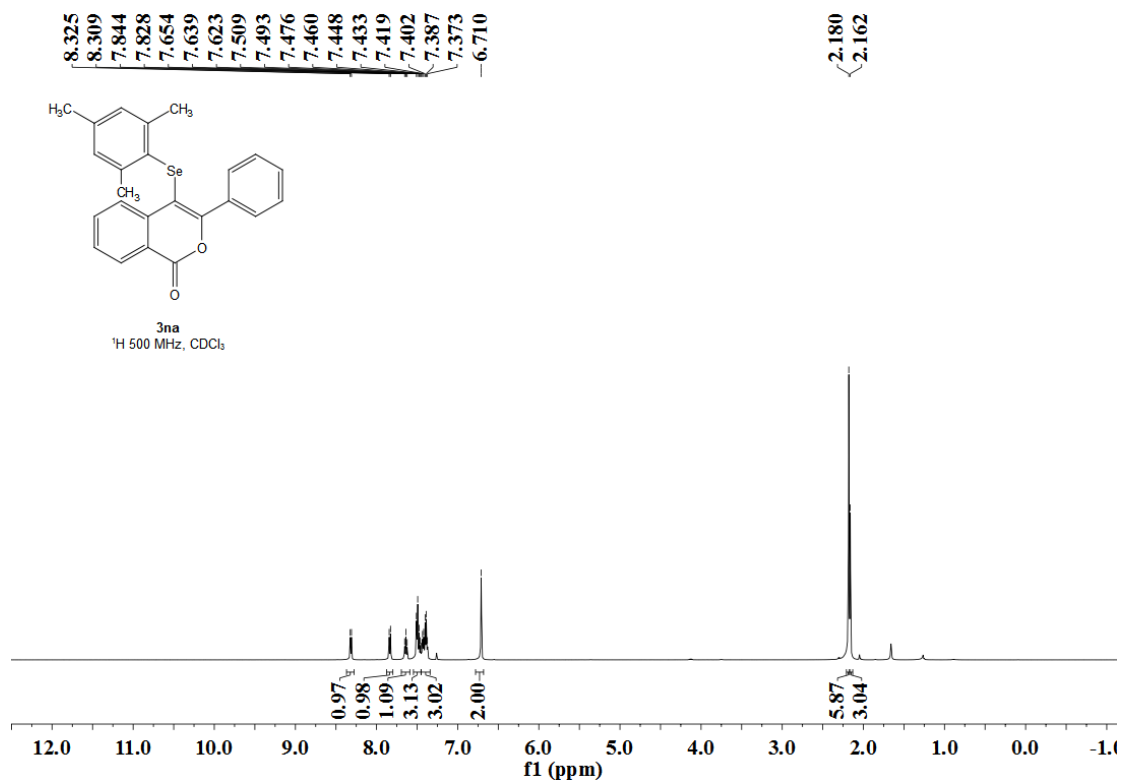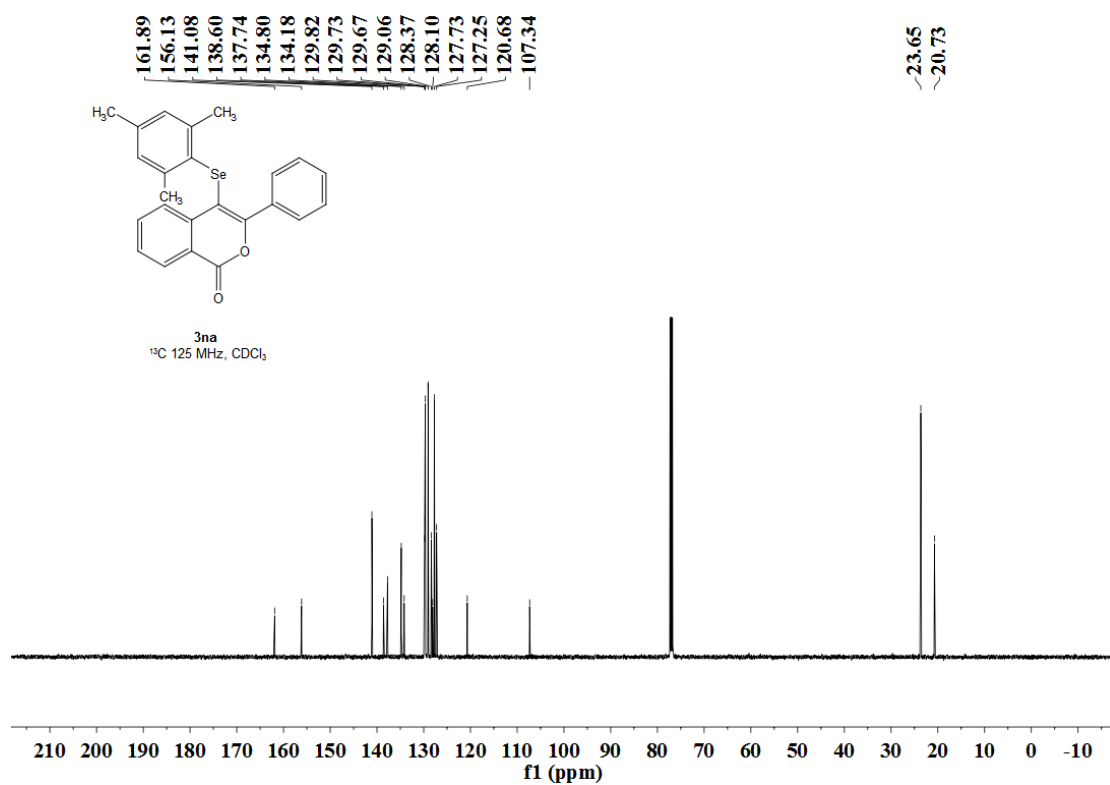

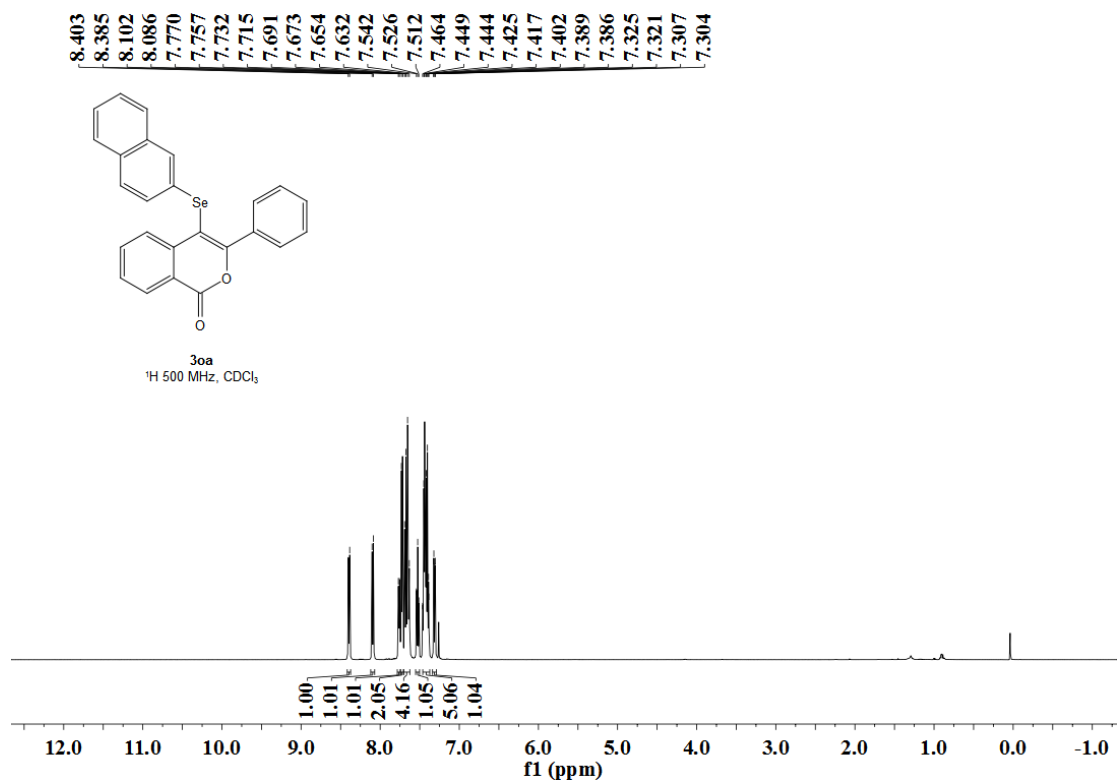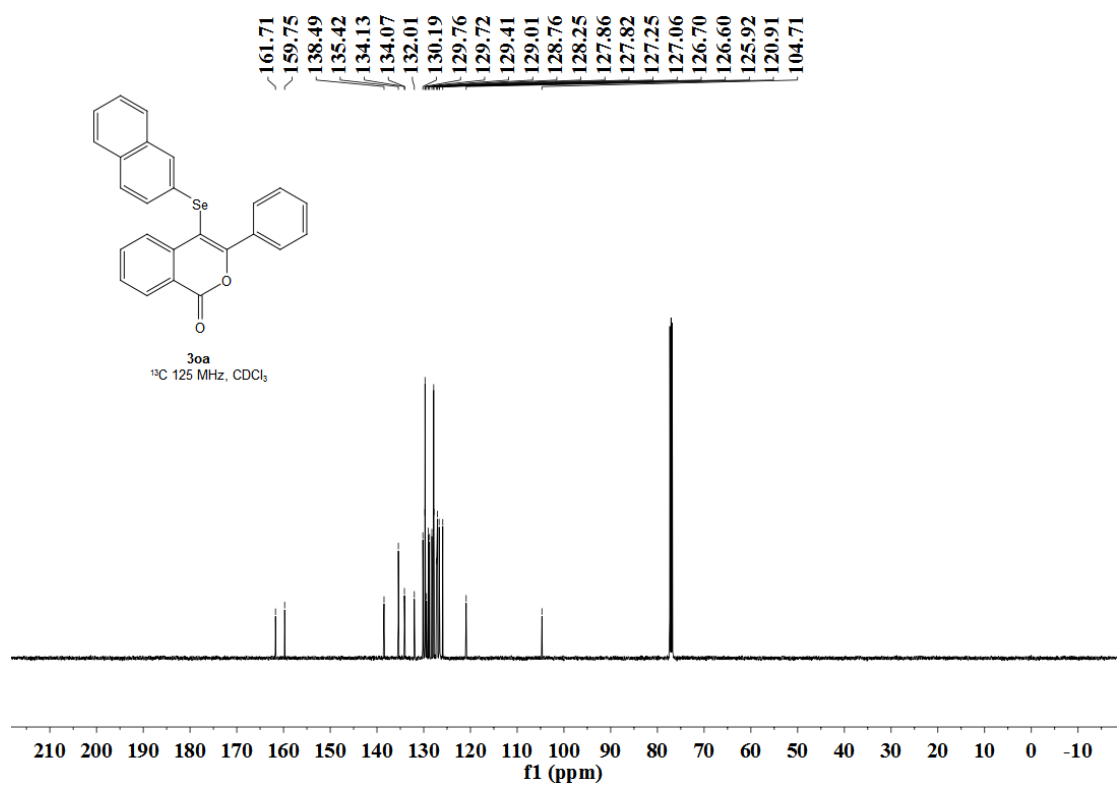

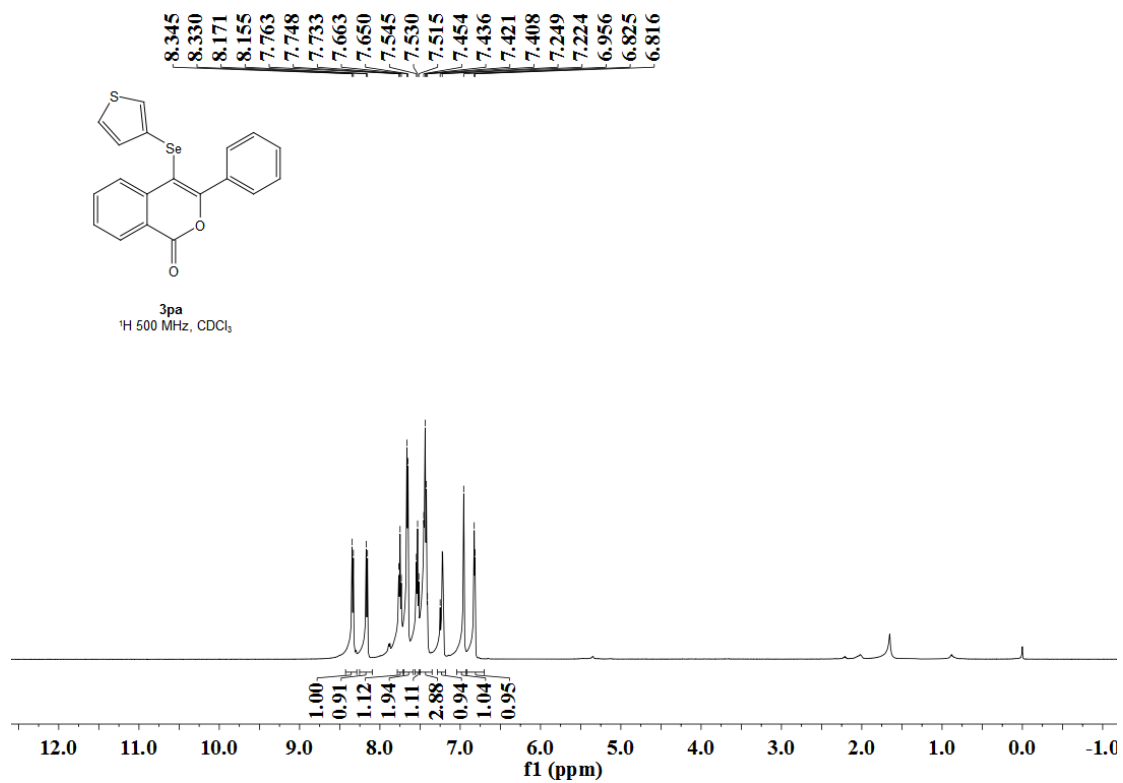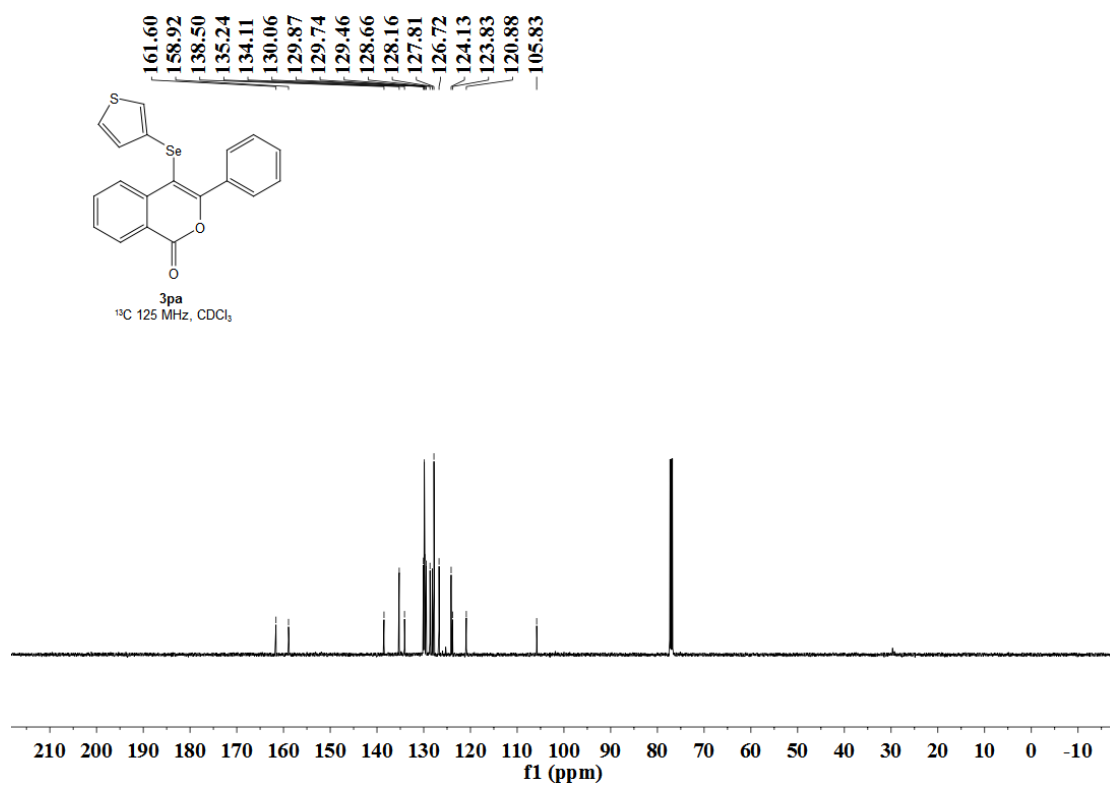

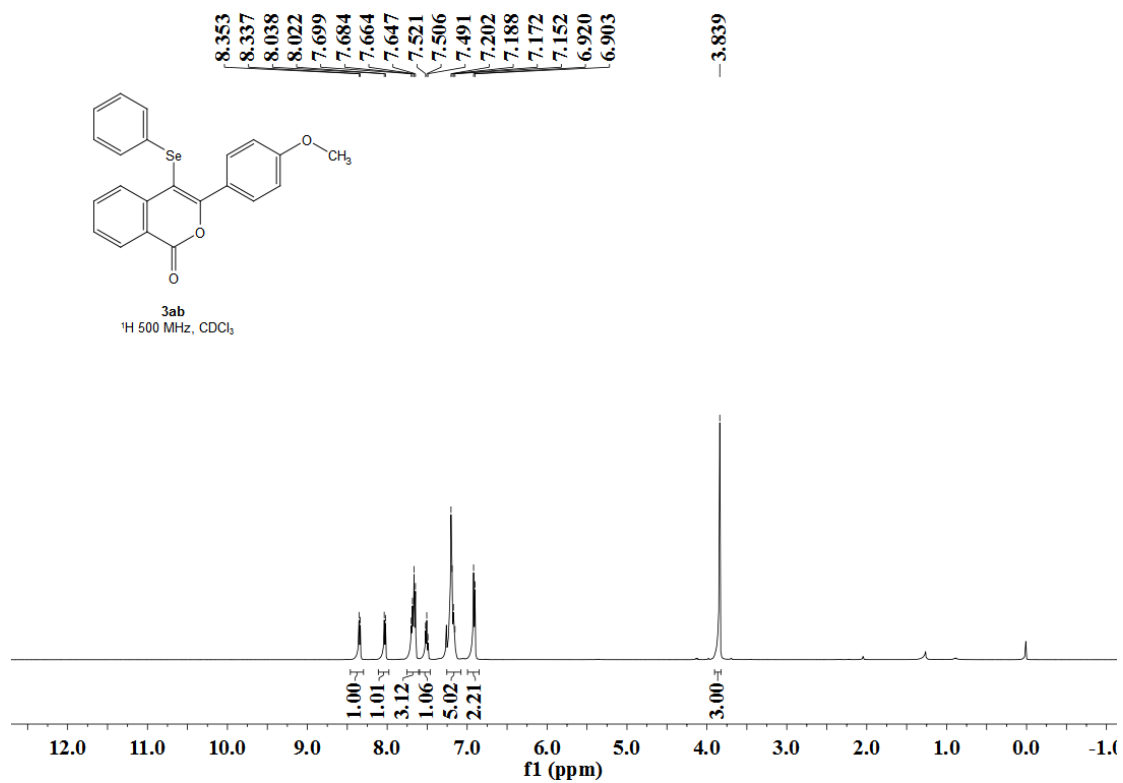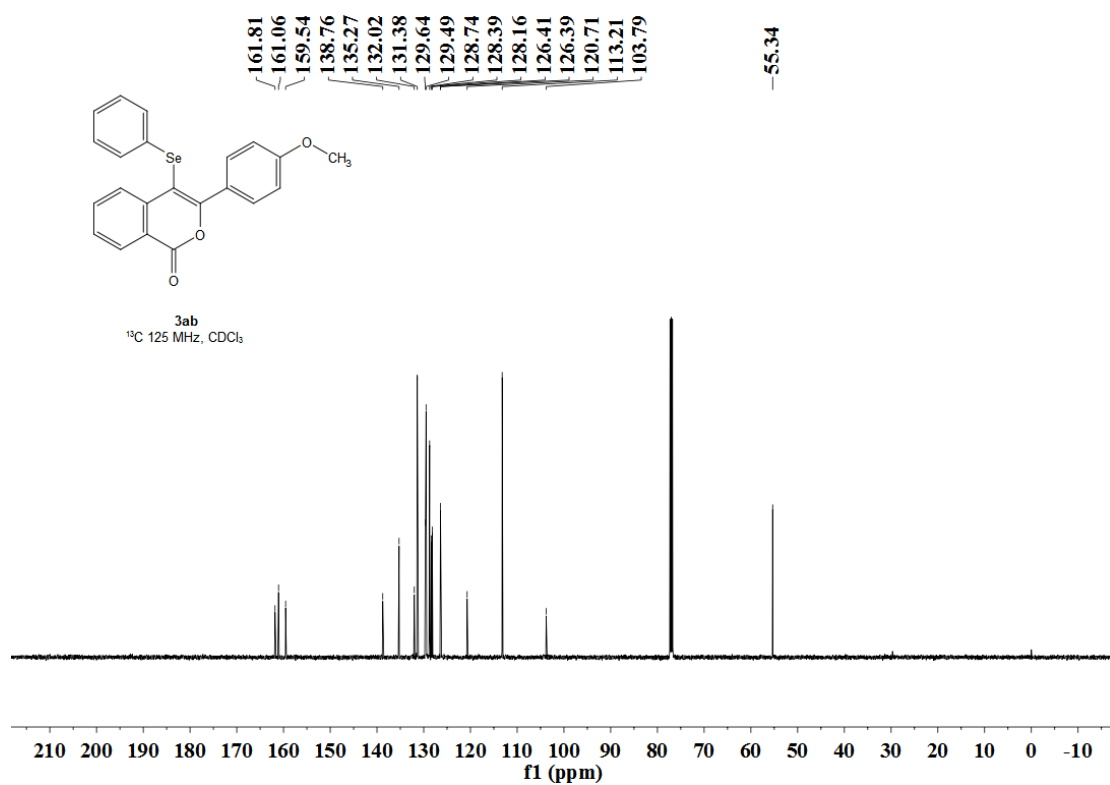

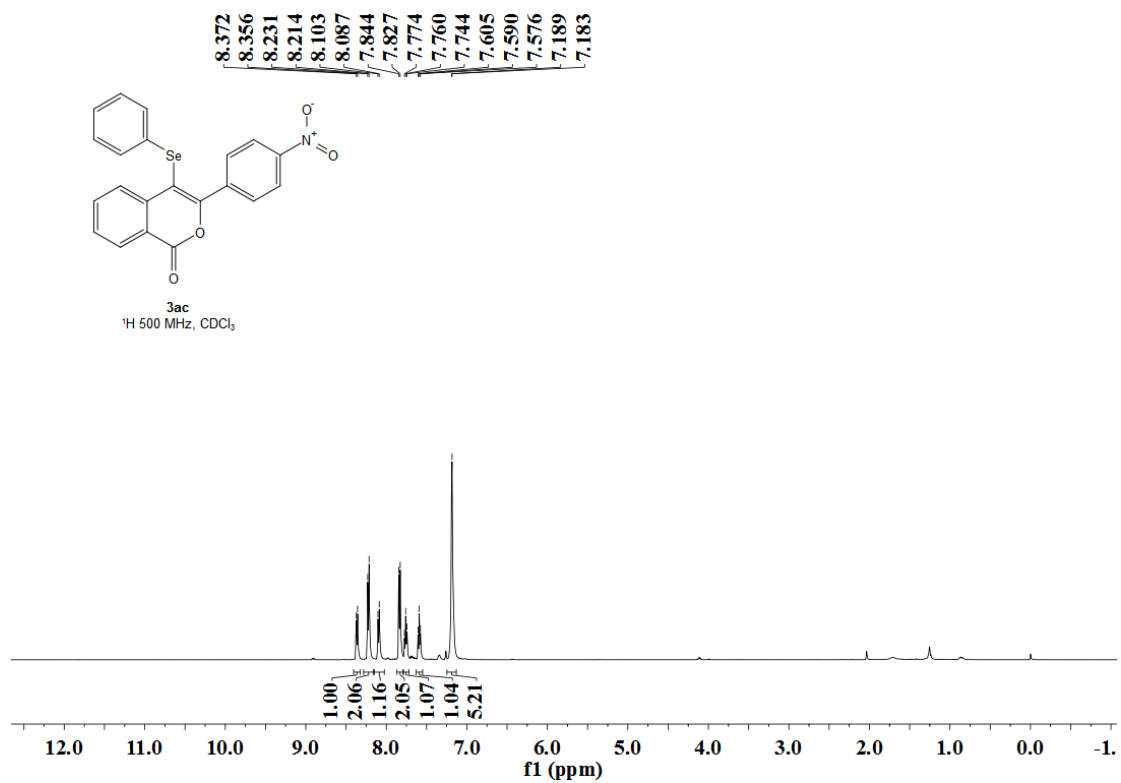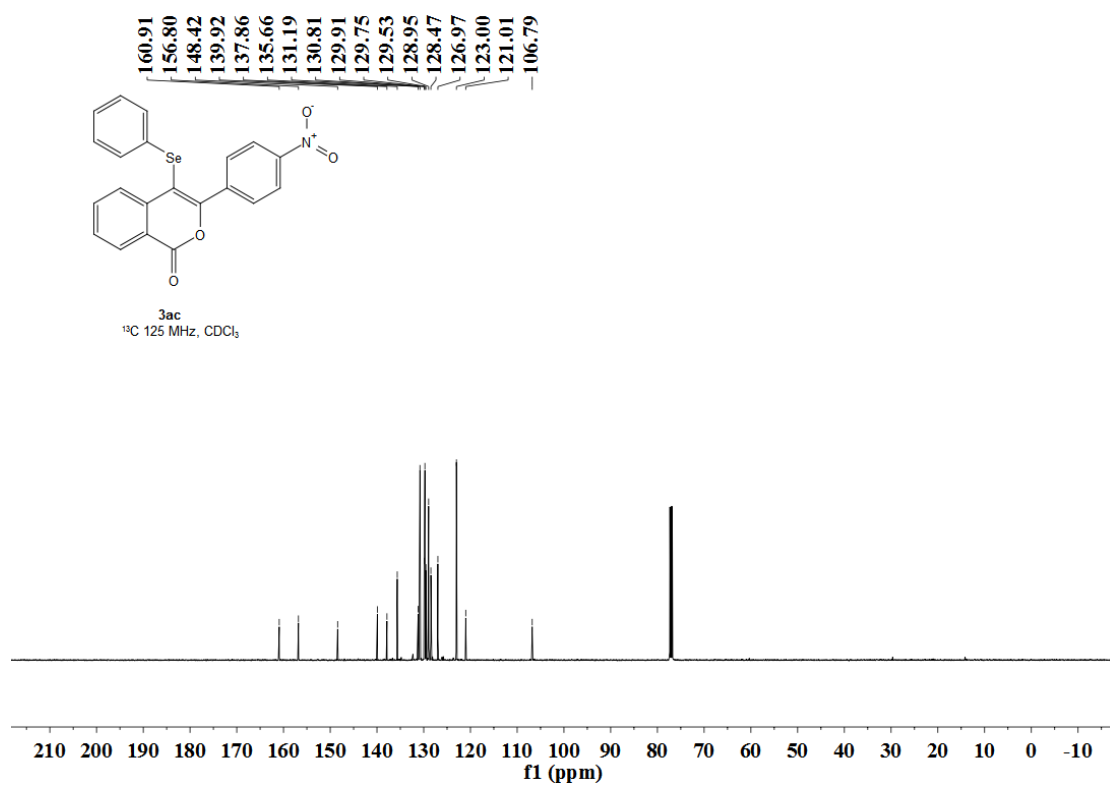



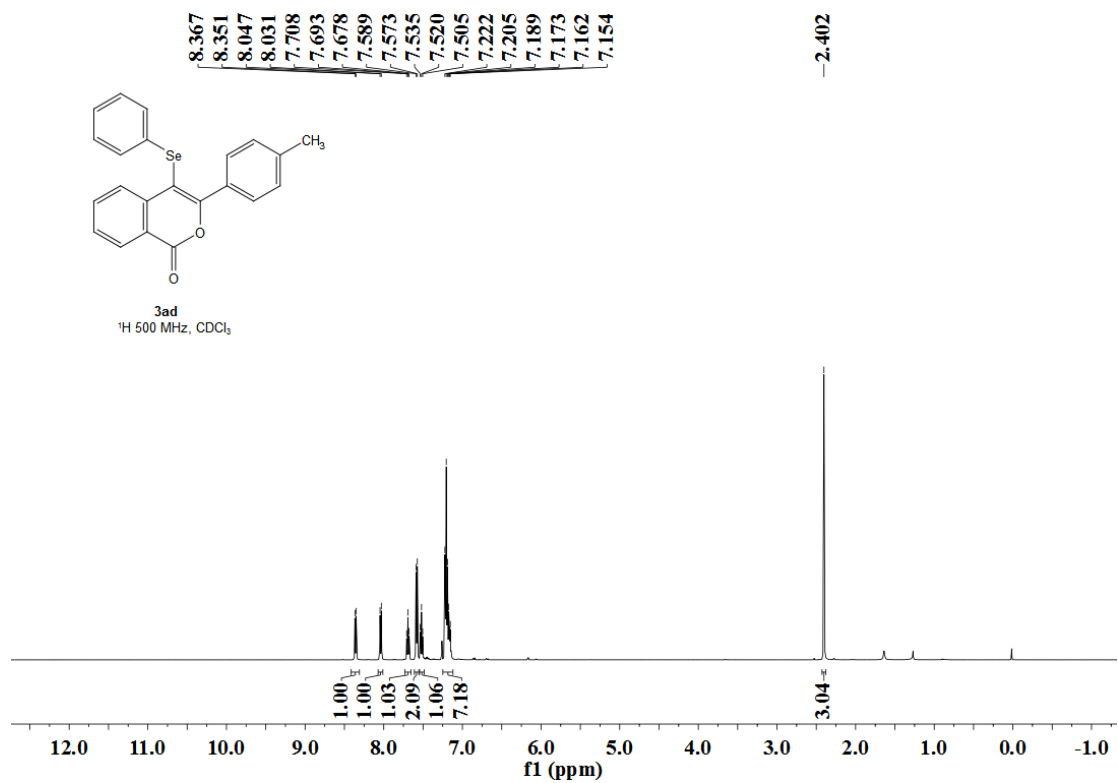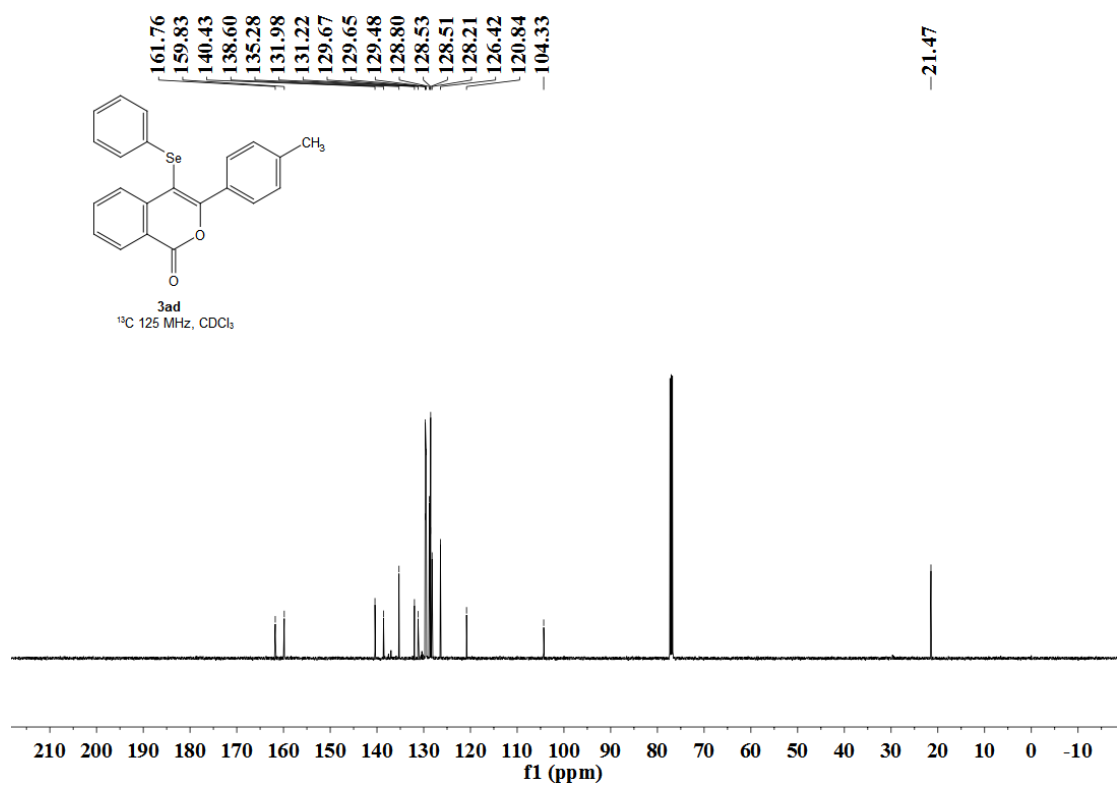

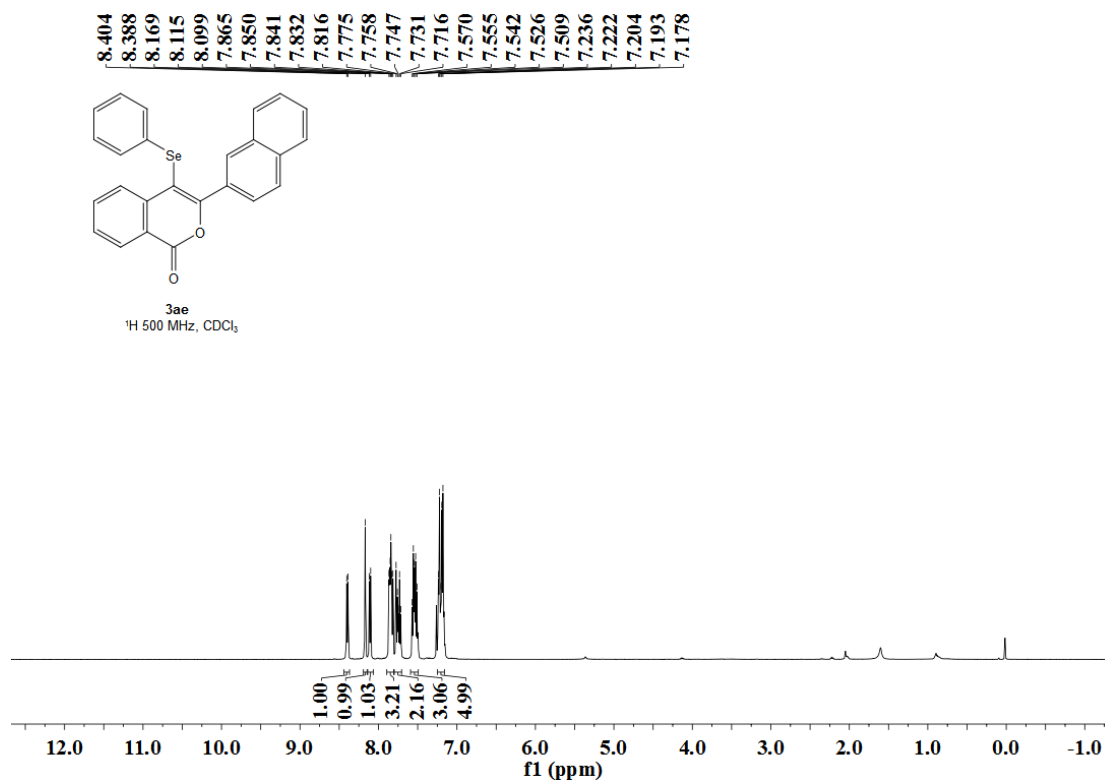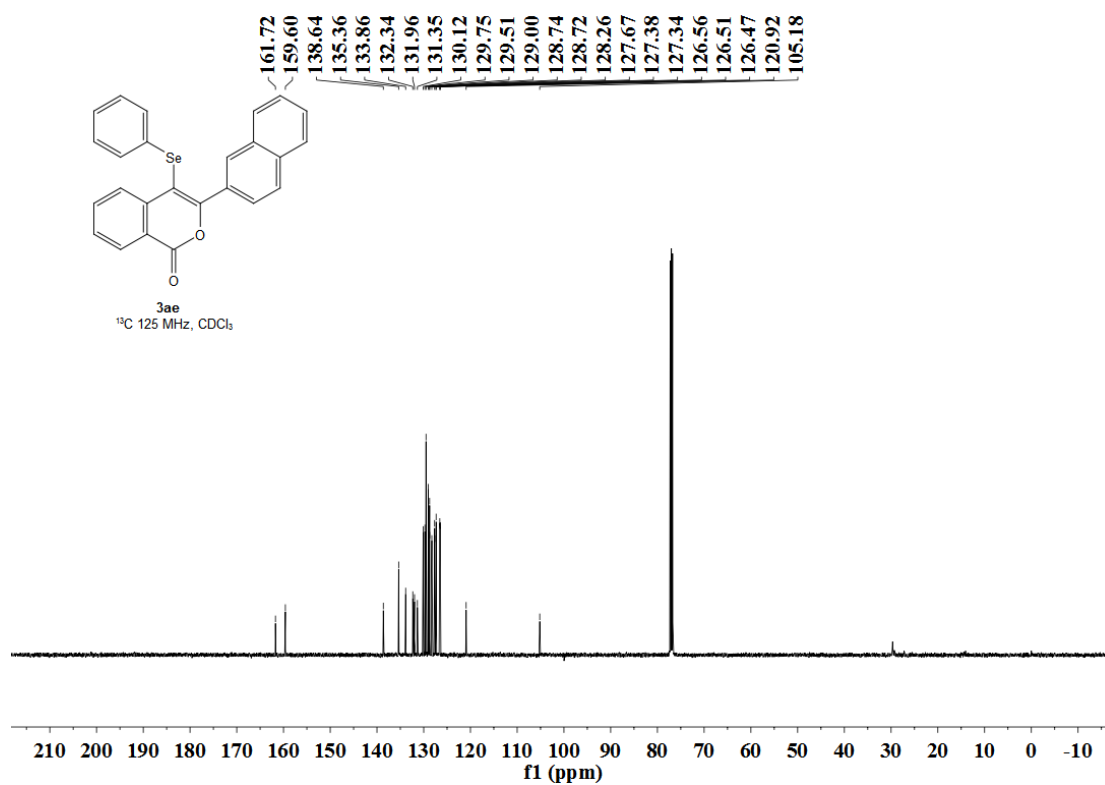

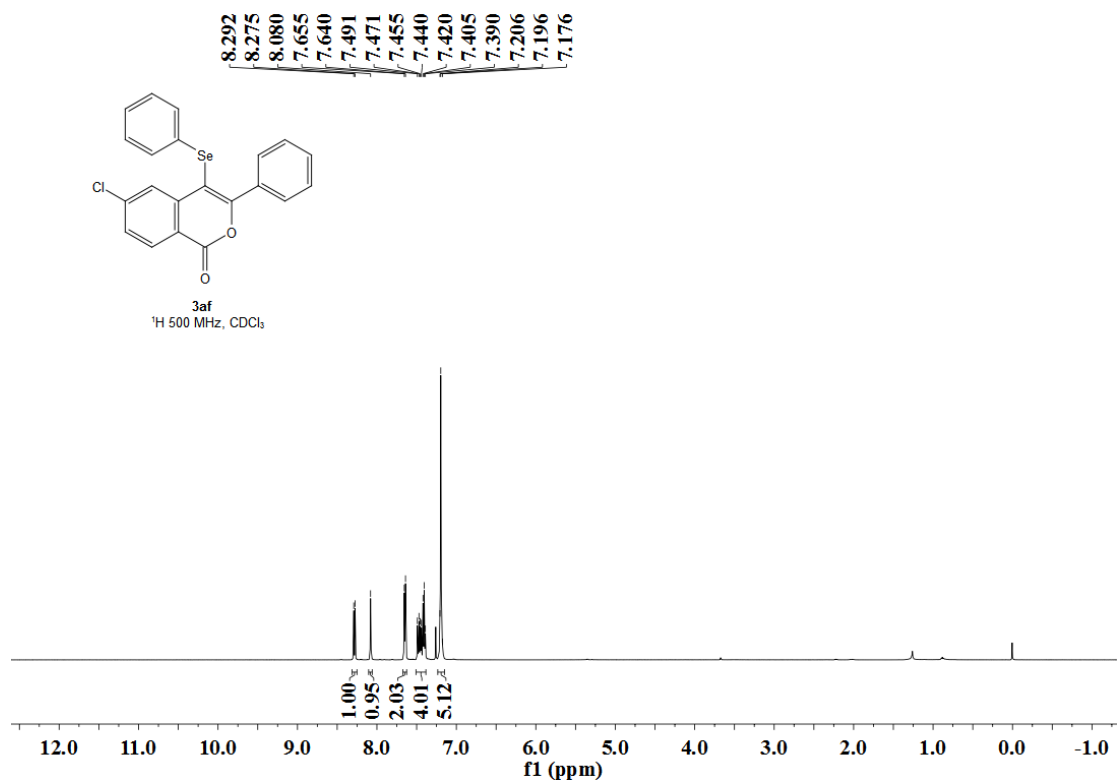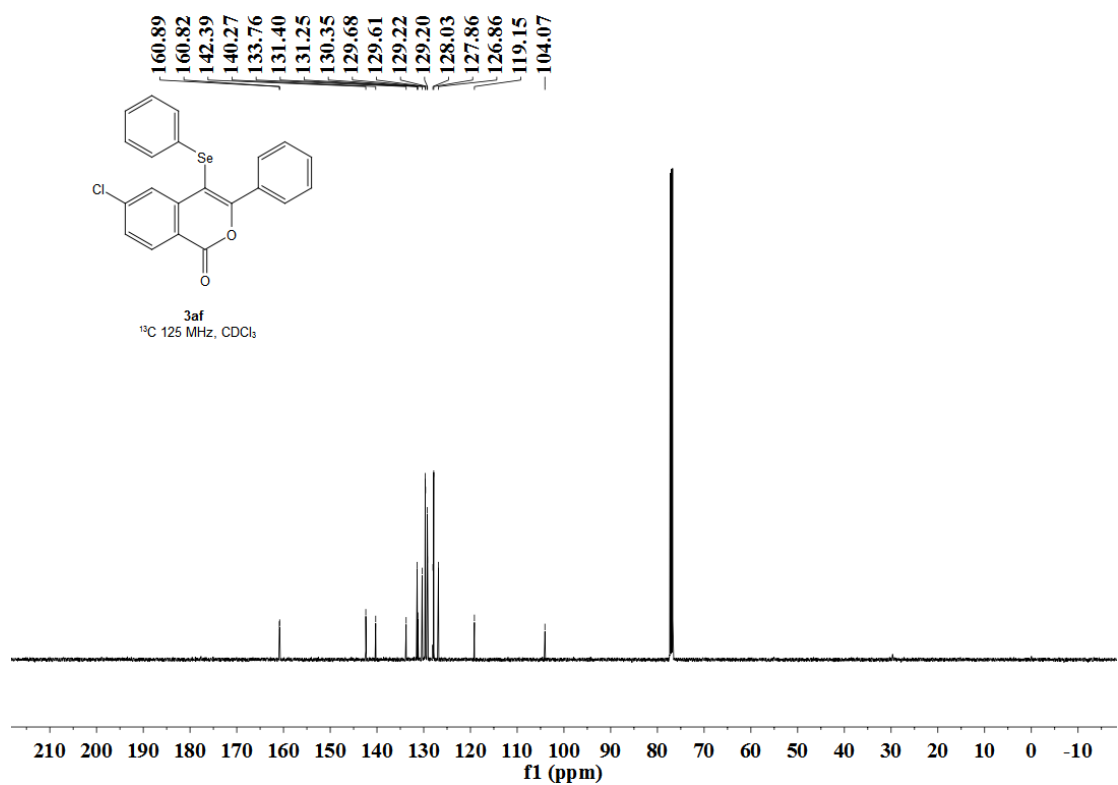

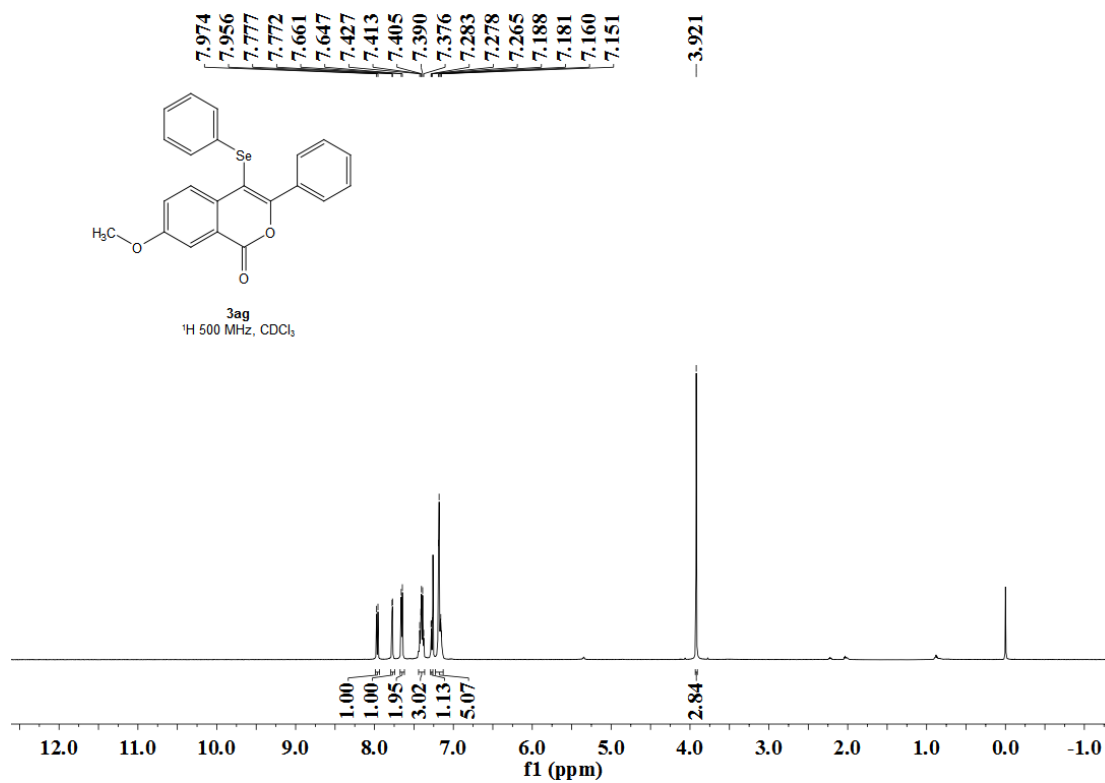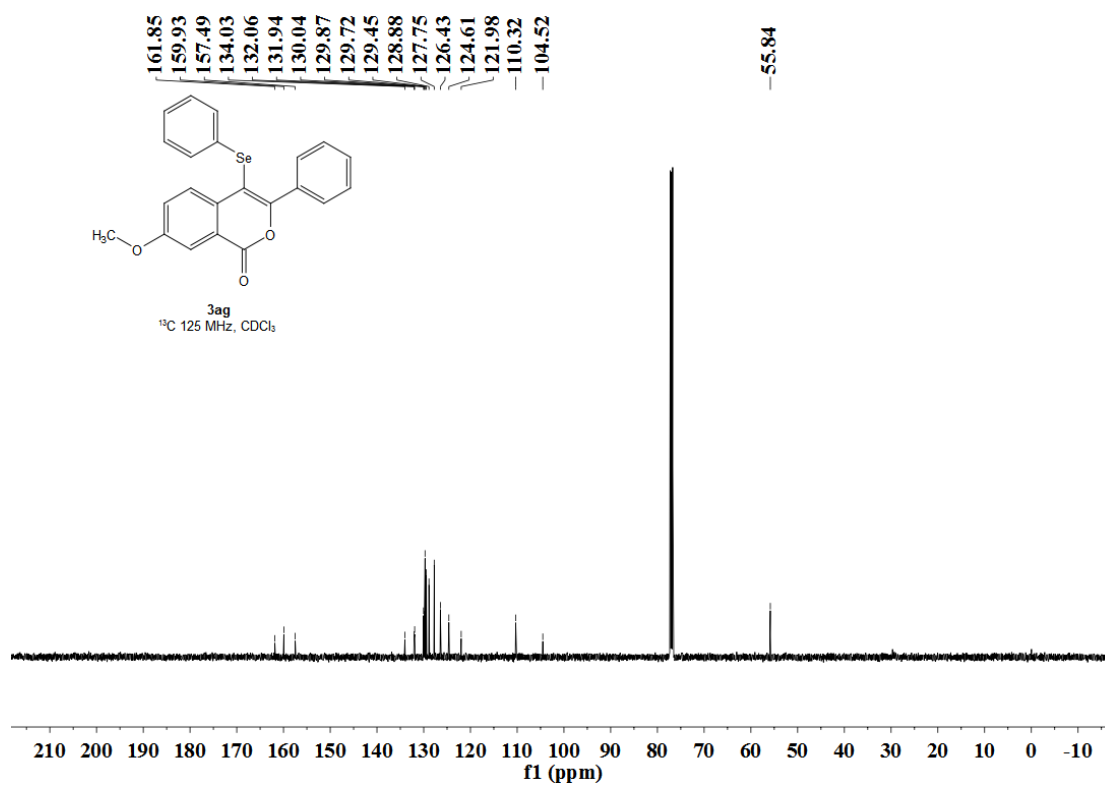

Supplement: d0ra06016j1.pdf [file d0ra06016j1.pdf]
